# Supplementary material for: First intramolecular Diels–Alder reactions using chromone derivatives: synthesis of chromeno[3,4-b]xanthones and 2-(benzo[c]chromenyl)chromones
Source: Royal Society of Chemistry journal article supplement (doi:10.1039/c7nj05185a), 2018-01-01
Supplement: c7nj05185a1.pdf [file c7nj05185a1.pdf]

## First intramolecular Diels-Alder using chromone derivatives: Synthesis of chromeno[3,4-*b*]xanthenes and (benzo[*c*]chromenyl)chromones

### Supporting Information

|                                                                                               |    |
|-----------------------------------------------------------------------------------------------|----|
| <b>Figure S1:</b> $^1\text{H}$ NMR of compound <b>4a</b> (500 MHz, $\text{CDCl}_3$ ).....     | 3  |
| <b>Figure S2:</b> $^{13}\text{C}$ NMR of compound <b>4a</b> (125 MHz, $\text{CDCl}_3$ ).....  | 3  |
| <b>Figure S3:</b> $^1\text{H}$ NMR of compound <b>4b</b> (500 MHz, $\text{CDCl}_3$ ).....     | 4  |
| <b>Figure S4:</b> $^{13}\text{C}$ NMR of compound <b>4b</b> (75 MHz, $\text{CDCl}_3$ ).....   | 4  |
| <b>Figure S5:</b> $^1\text{H}$ NMR of compound <b>4c</b> (500 MHz, $\text{CDCl}_3$ ).....     | 5  |
| <b>Figure S6:</b> $^{13}\text{C}$ NMR of compound <b>4c</b> (75 MHz, $\text{CDCl}_3$ ).....   | 5  |
| <b>Figure S7:</b> $^1\text{H}$ NMR of compound <b>4d</b> (300 MHz, $\text{CDCl}_3$ ).....     | 6  |
| <b>Figure S8:</b> $^{13}\text{C}$ NMR of compound <b>4d</b> (75 MHz, $\text{CDCl}_3$ ).....   | 6  |
| <b>Figure S9:</b> $^1\text{H}$ NMR of compound <b>6a</b> (300 MHz, $\text{CDCl}_3$ ).....     | 7  |
| <b>Figure S10:</b> $^{13}\text{C}$ NMR of compound <b>6a</b> (75 MHz, $\text{CDCl}_3$ ).....  | 7  |
| <b>Figure S11:</b> $^1\text{H}$ NMR of compound <b>6aa</b> (500 MHz, $\text{CDCl}_3$ ).....   | 8  |
| <b>Figure S12:</b> $^{13}\text{C}$ NMR of compound <b>6aa</b> (75 MHz, $\text{CDCl}_3$ )..... | 8  |
| <b>Figure S13:</b> $^1\text{H}$ NMR of compound <b>6b</b> (500 MHz, $\text{CDCl}_3$ ).....    | 9  |
| <b>Figure S14:</b> $^{13}\text{C}$ NMR of compound <b>6b</b> (125 MHz, $\text{CDCl}_3$ )..... | 9  |
| <b>Figure S15:</b> $^1\text{H}$ NMR of compound <b>6c</b> (500 MHz, $\text{CDCl}_3$ ).....    | 10 |
| <b>Figure S16:</b> $^{13}\text{C}$ NMR of compound <b>6c</b> (125 MHz, $\text{CDCl}_3$ )..... | 10 |
| <b>Figure S17:</b> $^1\text{H}$ NMR of compound <b>6d</b> (300 MHz, $\text{CDCl}_3$ ).....    | 11 |
| <b>Figure S18:</b> $^{13}\text{C}$ NMR of compound <b>6d</b> (125 MHz, $\text{CDCl}_3$ )..... | 11 |
| <b>Figure S19:</b> $^1\text{H}$ NMR of compound <b>7a</b> (300 MHz, $\text{CDCl}_3$ ).....    | 12 |
| <b>Figure S20:</b> $^{13}\text{C}$ NMR of compound <b>7a</b> (125 MHz, $\text{CDCl}_3$ )..... | 12 |
| <b>Figure S21:</b> $^1\text{H}$ NMR of compound <b>7b</b> (300 MHz, $\text{CDCl}_3$ ).....    | 13 |
| <b>Figure S22:</b> $^{13}\text{C}$ NMR of compound <b>7b</b> (75 MHz, $\text{CDCl}_3$ ).....  | 13 |
| <b>Figure S23:</b> $^1\text{H}$ NMR of compound <b>7c</b> (500 MHz, $\text{CDCl}_3$ ).....    | 14 |
| <b>Figure S24:</b> $^{13}\text{C}$ NMR of compound <b>7c</b> (75 MHz, $\text{CDCl}_3$ ).....  | 14 |
| <b>Figure S25:</b> $^1\text{H}$ NMR of compound <b>7d</b> (500 MHz, $\text{CDCl}_3$ ).....    | 15 |
| <b>Figure S26:</b> $^{13}\text{C}$ NMR of compound <b>7d</b> (125 MHz, $\text{CDCl}_3$ )..... | 15 |
| <b>Figure S27:</b> $^1\text{H}$ NMR of compound <b>9</b> (300 MHz, $\text{CDCl}_3$ ).....     | 16 |
| <b>Figure S28:</b> $^{13}\text{C}$ NMR of compound <b>9</b> (75 MHz, $\text{CDCl}_3$ ).....   | 16 |
| <b>Figure S29:</b> $^1\text{H}$ NMR of compound <b>10</b> (300 MHz, $\text{CDCl}_3$ ).....    | 17 |
| <b>Figure S30:</b> $^{13}\text{C}$ NMR of compound <b>10</b> (75 MHz, $\text{CDCl}_3$ ).....  | 17 |
| <b>Figure S31:</b> $^1\text{H}$ NMR of compound <b>11</b> (300 MHz, $\text{CDCl}_3$ ).....    | 18 |
| <b>Figure S32:</b> $^{13}\text{C}$ NMR of compound <b>11</b> (75 MHz, $\text{CDCl}_3$ ).....  | 18 |
| <b>Figure S33:</b> $^1\text{H}$ NMR of compound <b>12a</b> (300 MHz, $\text{CDCl}_3$ ).....   | 19 |
| <b>Figure S34:</b> $^{13}\text{C}$ NMR of compound <b>12a</b> (75 MHz, $\text{CDCl}_3$ )..... | 19 |
| <b>Figure S35:</b> $^1\text{H}$ NMR of compound <b>12b</b> (500 MHz, $\text{CDCl}_3$ ).....   | 20 |

|                                                                                                |    |
|------------------------------------------------------------------------------------------------|----|
| <b>Figure S36:</b> $^{13}\text{C}$ NMR of compound <b>12b</b> (125 MHz, $\text{CDCl}_3$ )..... | 20 |
| <b>Figure S37:</b> $^1\text{H}$ NMR of compound <b>12c</b> (500 MHz, $\text{CDCl}_3$ ).....    | 21 |
| <b>Figure S38:</b> $^{13}\text{C}$ NMR of compound <b>12c</b> (75 MHz, $\text{CDCl}_3$ ).....  | 21 |
| <b>Figure S39:</b> $^1\text{H}$ NMR of compound <b>12d</b> (300 MHz, $\text{CDCl}_3$ ).....    | 22 |
| <b>Figure S40:</b> $^{13}\text{C}$ NMR of compound <b>12d</b> (75 MHz, $\text{CDCl}_3$ ).....  | 22 |
| <b>Figure S41:</b> $^1\text{H}$ NMR of compound <b>13a</b> (300 MHz, $\text{CDCl}_3$ ).....    | 23 |
| <b>Figure S42:</b> $^{13}\text{C}$ NMR of compound <b>13a</b> (75 MHz, $\text{CDCl}_3$ ).....  | 23 |
| <b>Figure S43:</b> $^1\text{H}$ NMR of compound <b>13b</b> (300 MHz, $\text{CDCl}_3$ ).....    | 24 |
| <b>Figure S44:</b> $^{13}\text{C}$ NMR of compound <b>13b</b> (75 MHz, $\text{CDCl}_3$ ).....  | 24 |
| <b>Figure S45:</b> $^1\text{H}$ NMR of compound <b>13c</b> (300 MHz, $\text{CDCl}_3$ ).....    | 25 |
| <b>Figure S46:</b> $^1\text{H}$ NMR of compound <b>13c</b> (75 MHz, $\text{CDCl}_3$ ).....     | 25 |
| <b>Figure S47:</b> $^1\text{H}$ NMR of compound <b>13d</b> (300 MHz, $\text{CDCl}_3$ ).....    | 26 |
| <b>Figure S48:</b> $^{13}\text{C}$ NMR of compound <b>13d</b> (75 MHz, $\text{CDCl}_3$ ).....  | 26 |
| <b>Figure S49:</b> $^1\text{H}$ NMR of compound <b>15</b> (500 MHz, $\text{CDCl}_3$ ).....     | 27 |
| <b>Figure S50:</b> $^{13}\text{C}$ NMR of compound <b>15</b> (75 MHz, $\text{CDCl}_3$ ).....   | 27 |
| <b>Figure S51:</b> $^1\text{H}$ NMR of compound <b>16</b> (300 MHz, $\text{CDCl}_3$ ).....     | 28 |
| <b>Figure S52:</b> $^{13}\text{C}$ NMR of compound <b>16</b> (75 MHz, $\text{CDCl}_3$ ).....   | 28 |
| <b>Figure S53:</b> $^1\text{H}$ NMR of compound <b>17</b> (300 MHz, $\text{CDCl}_3$ ).....     | 29 |
| <b>Figure S54:</b> $^{13}\text{C}$ NMR of compound <b>17</b> (75 MHz, $\text{CDCl}_3$ ).....   | 29 |

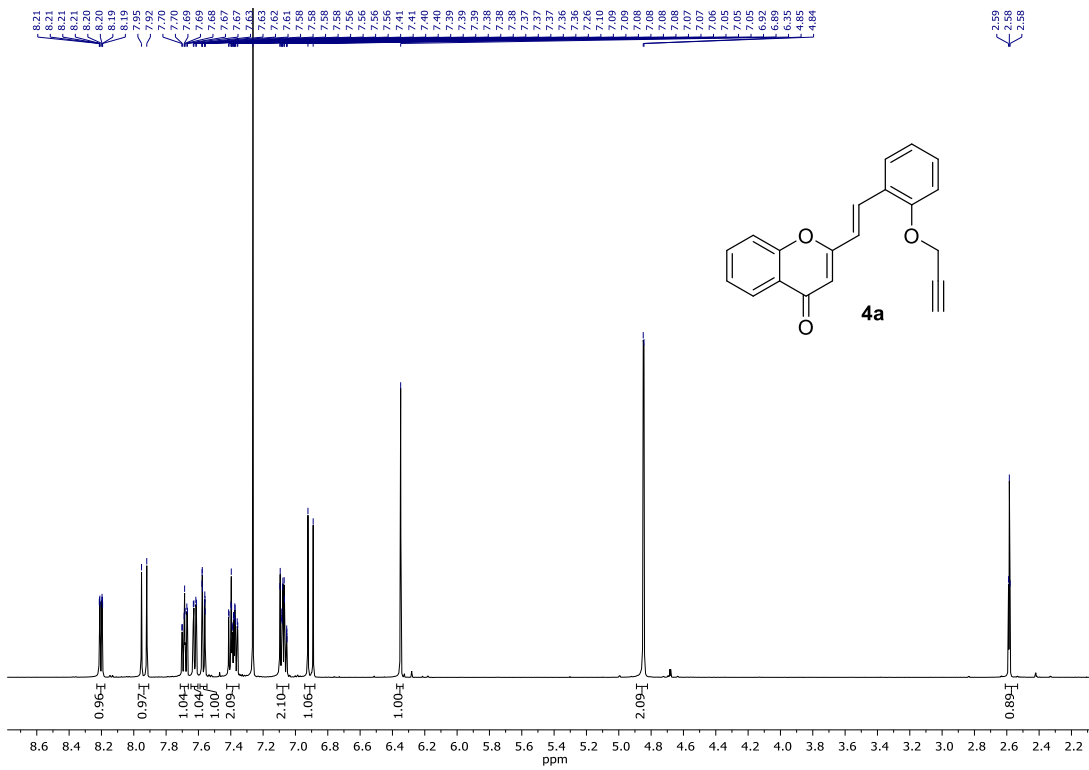

Figure S1: <sup>1</sup>H NMR of compound 4a (500 MHz, CDCl<sub>3</sub>).

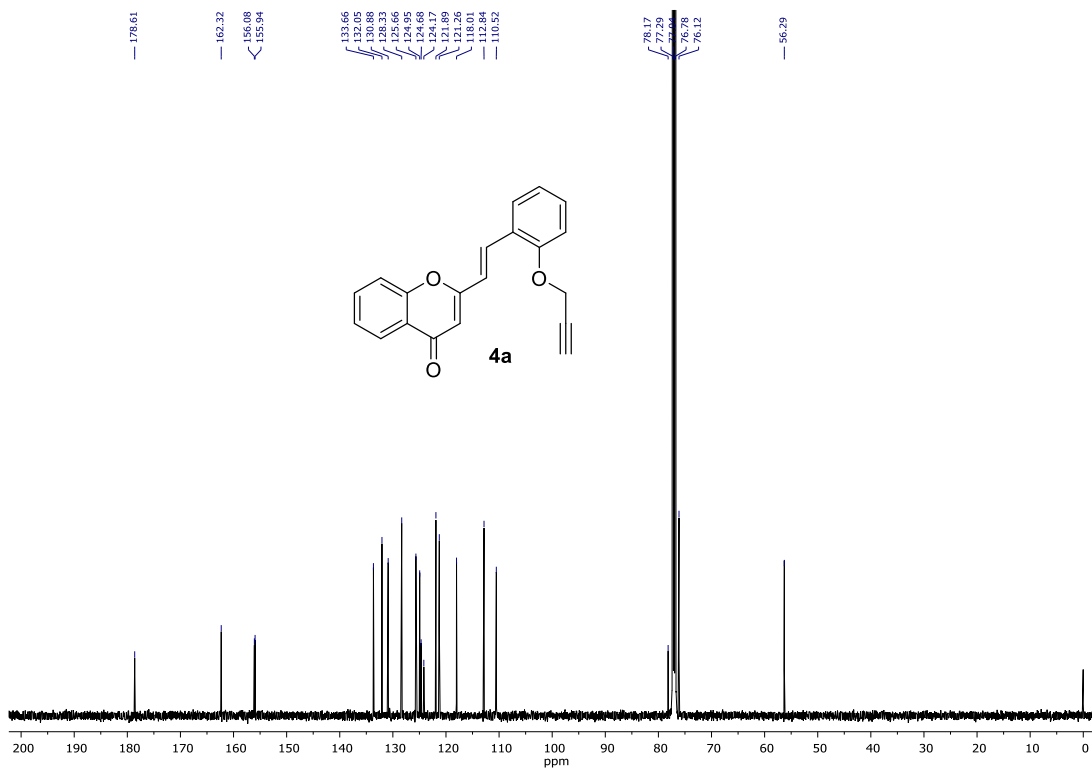

Figure S2: <sup>13</sup>C NMR of compound 4a (125 MHz, CDCl<sub>3</sub>).

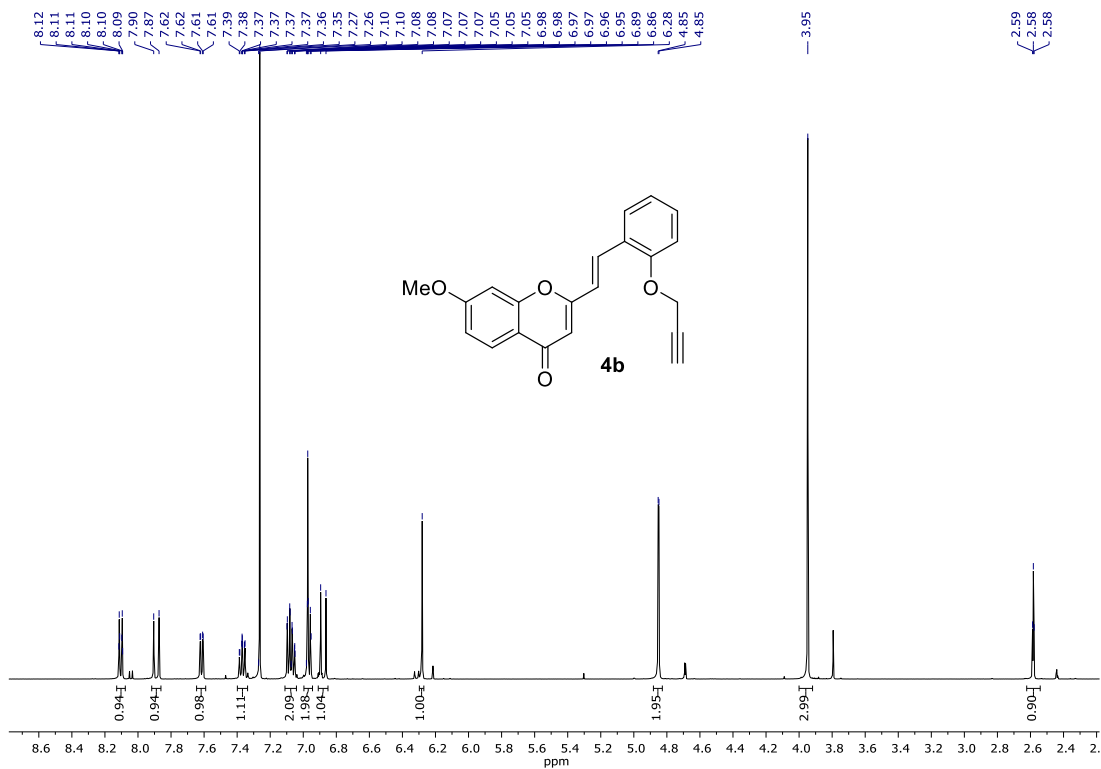

Figure S3:  $^1\text{H}$  NMR of compound **4b** (500 MHz,  $\text{CDCl}_3$ ).

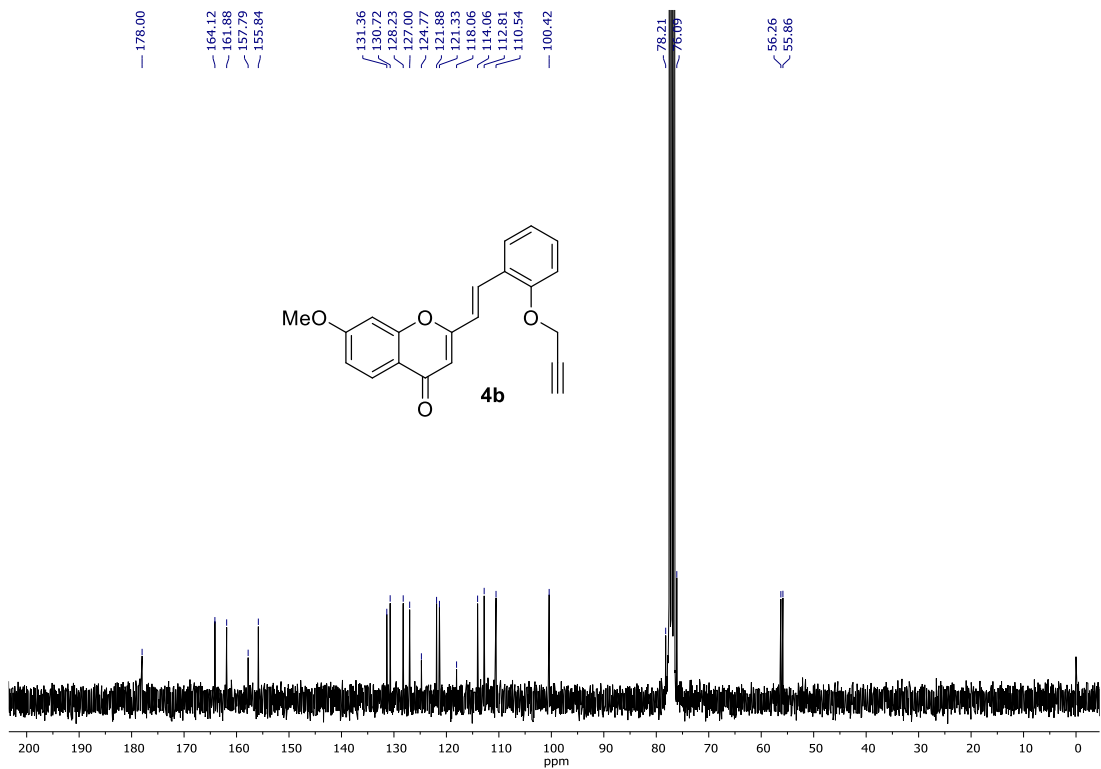

Figure S4:  $^{13}\text{C}$  NMR of compound **4b** (75 MHz,  $\text{CDCl}_3$ ).

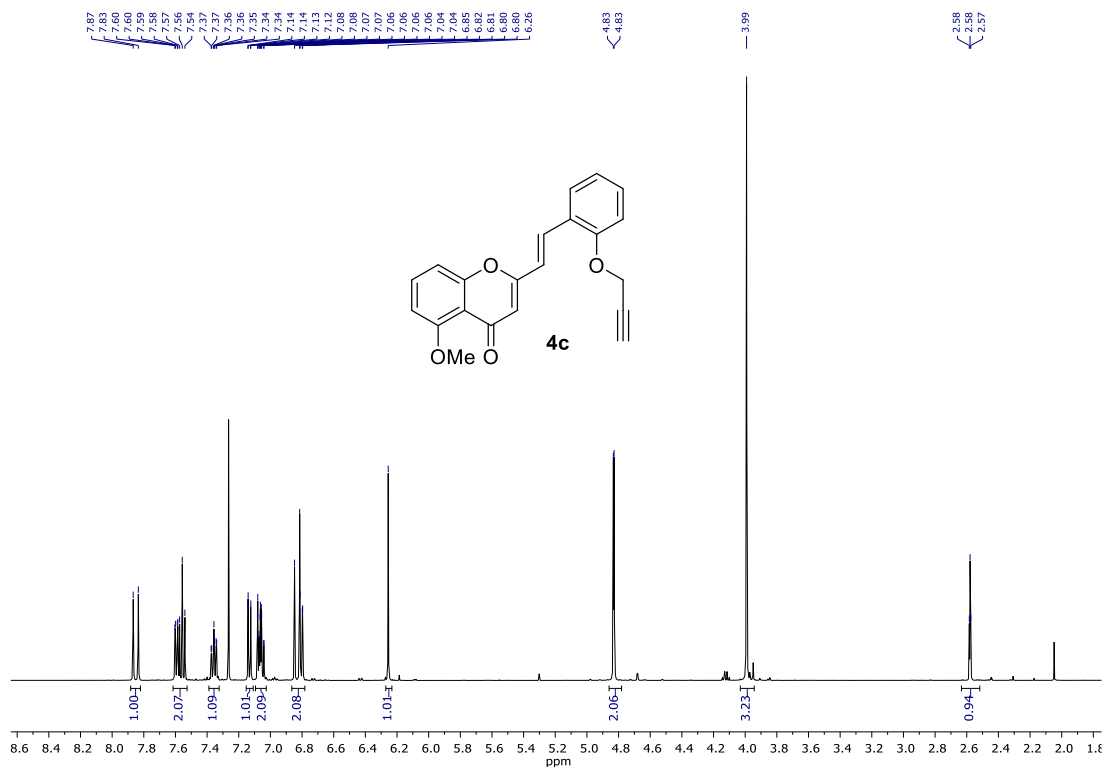

Figure S5: <sup>1</sup>H NMR of compound **4c** (500 MHz, CDCl<sub>3</sub>).

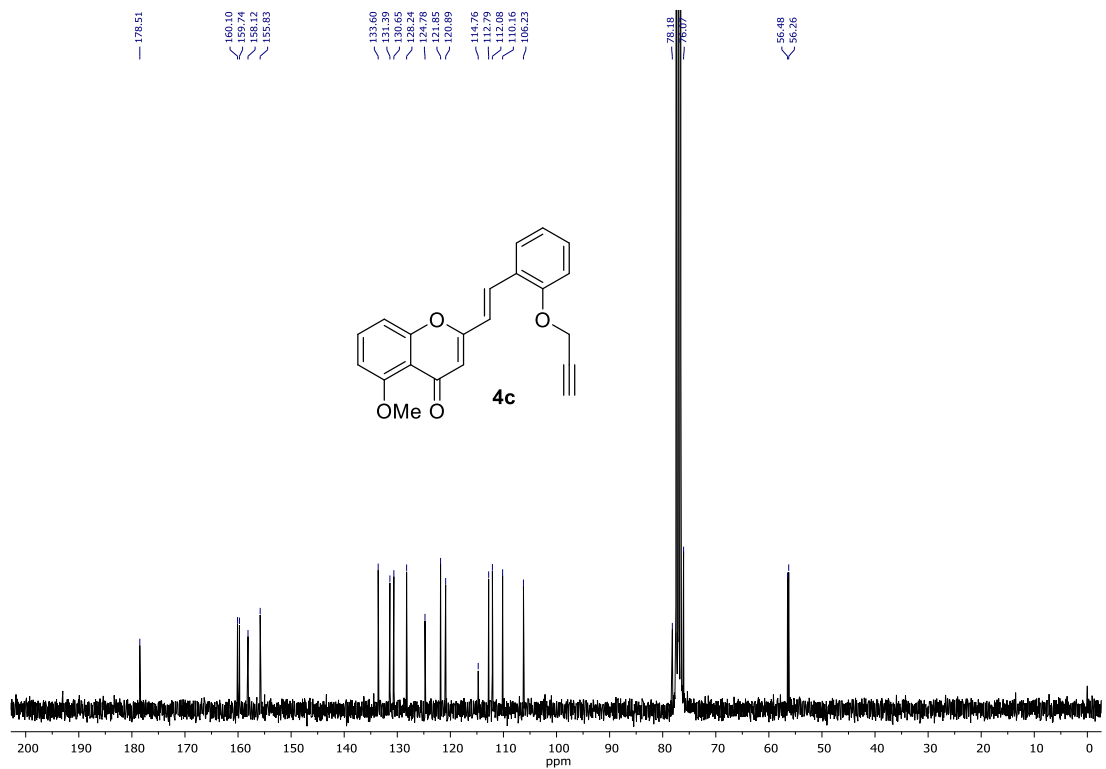

Figure S6: <sup>13</sup>C NMR of compound **4c** (75 MHz, CDCl<sub>3</sub>).

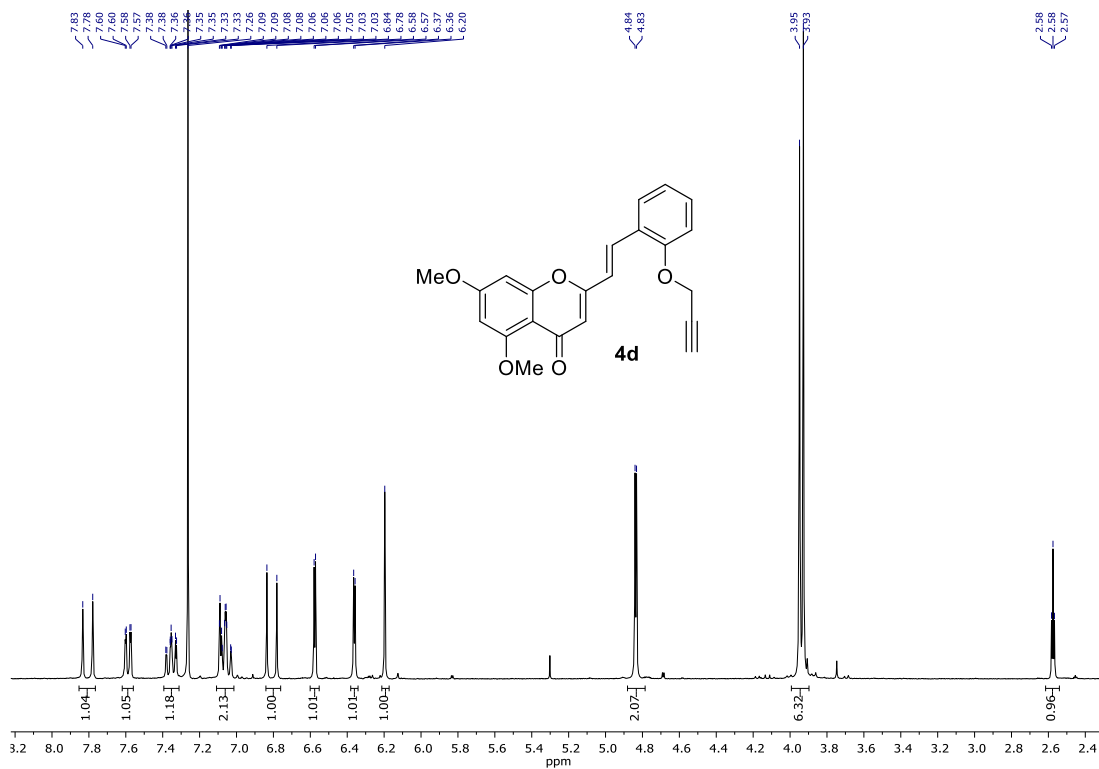

Figure S7: <sup>1</sup>H NMR of compound **4d** (300 MHz, CDCl<sub>3</sub>).

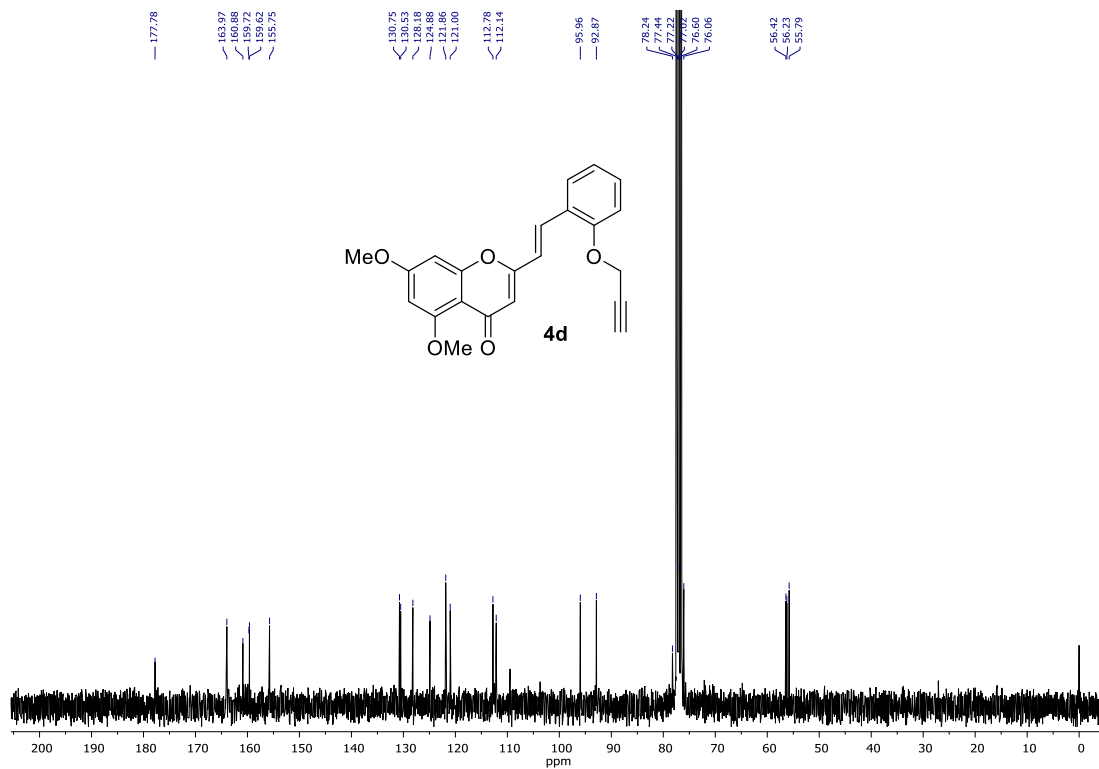

Figure S8: <sup>13</sup>C NMR of compound **4d** (75 MHz, CDCl<sub>3</sub>).

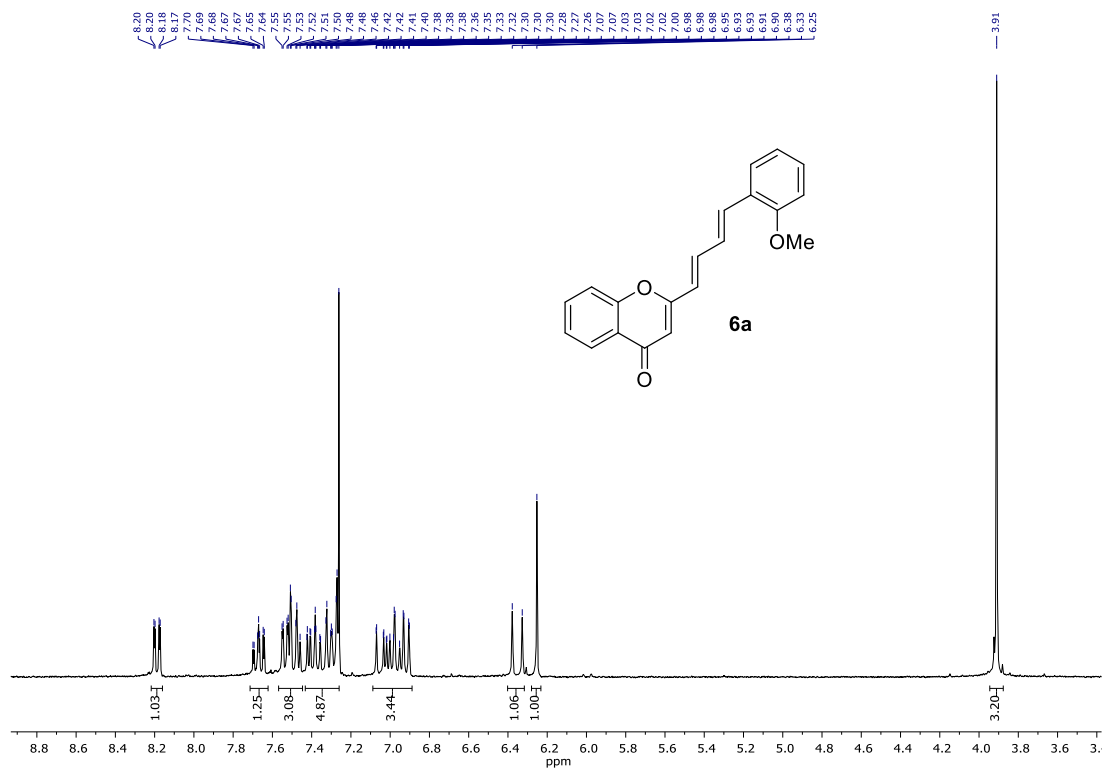

Figure S9: <sup>1</sup>H NMR of compound **6a** (300 MHz, CDCl<sub>3</sub>).

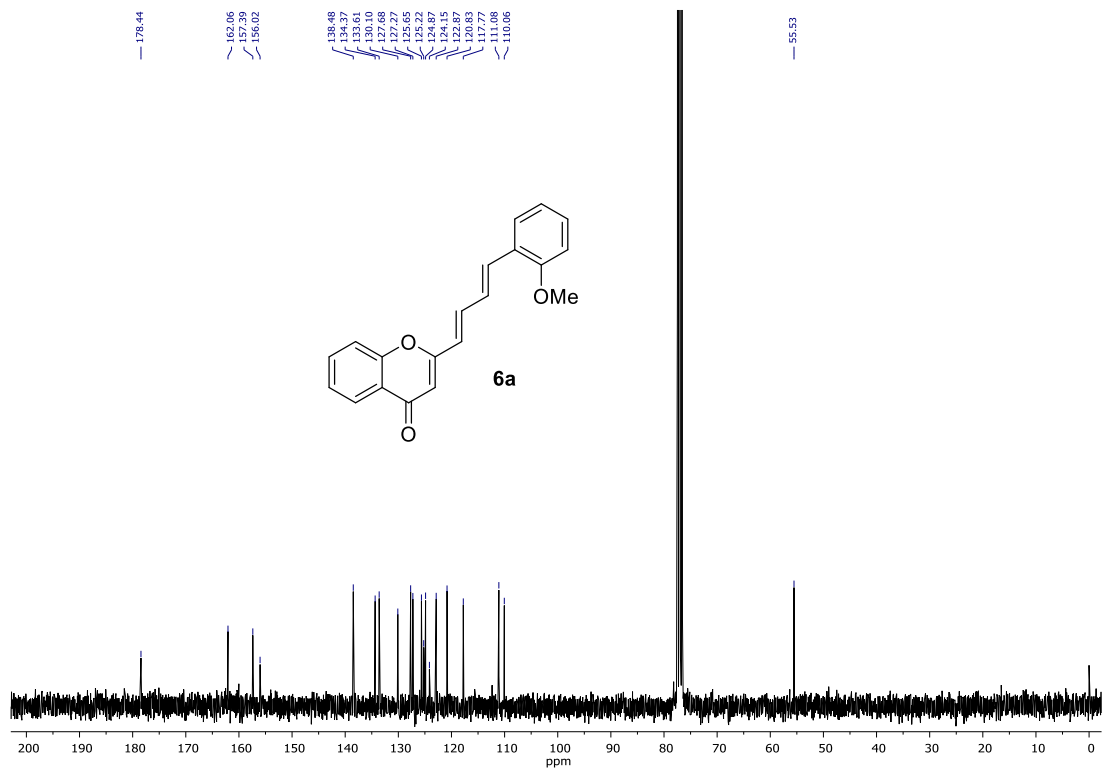

Figure S10: <sup>13</sup>C NMR of compound **6a** (75 MHz, CDCl<sub>3</sub>).

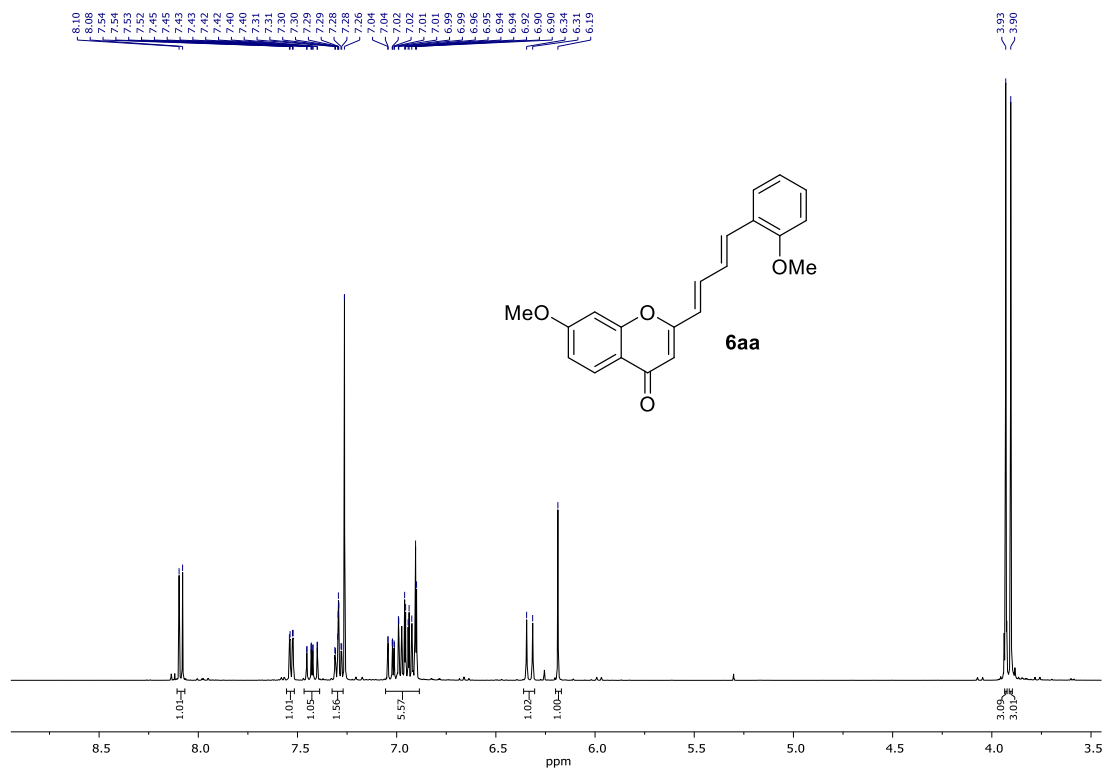

Figure S11: <sup>1</sup>H NMR of compound **6aa** (500 MHz, CDCl<sub>3</sub>).

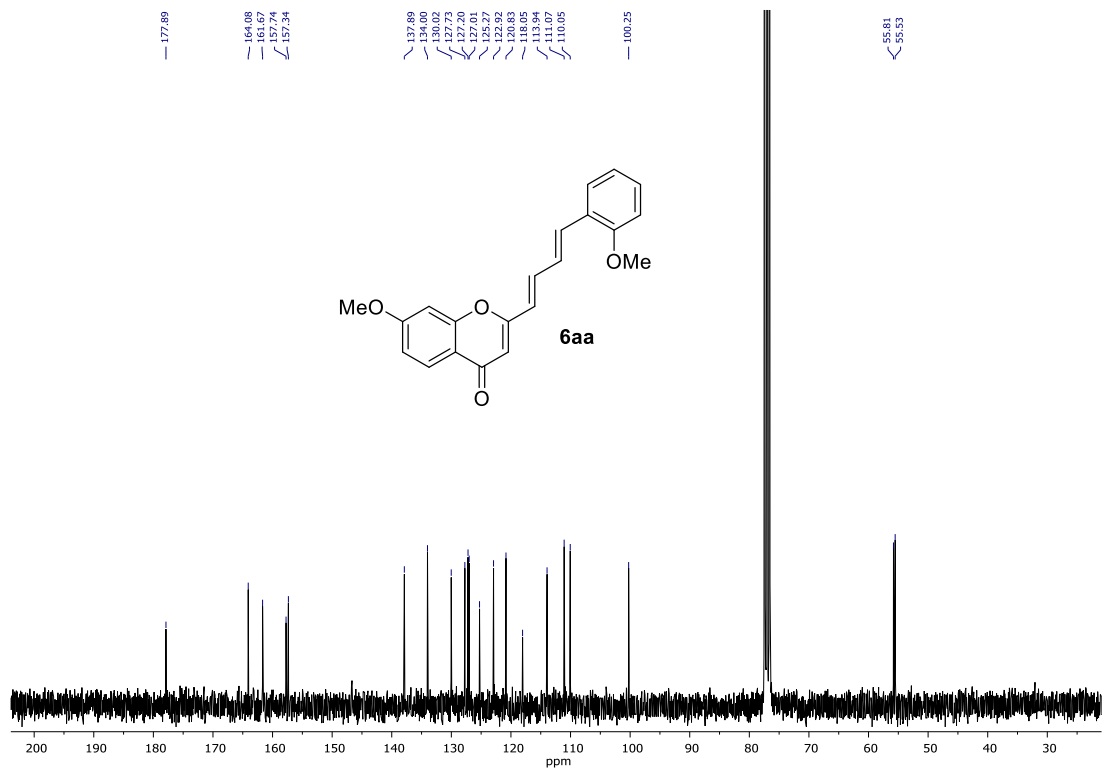

Figure S12: <sup>13</sup>C NMR of compound **6aa** (75 MHz, CDCl<sub>3</sub>).



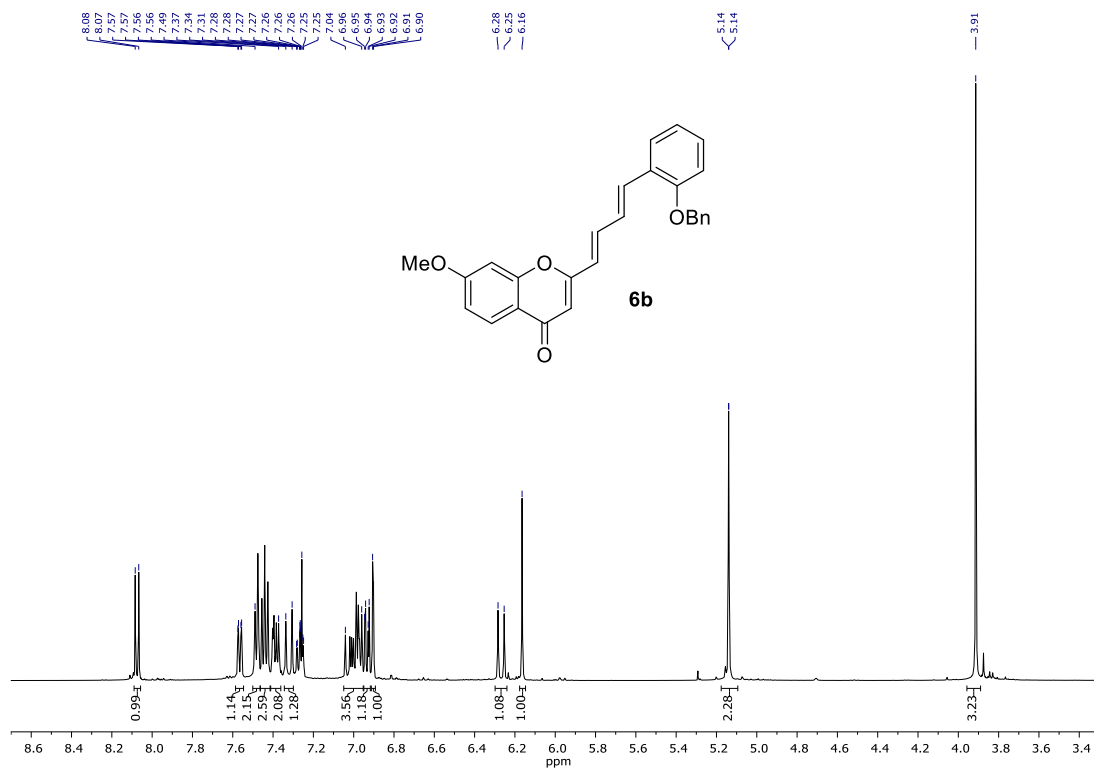

Figure S13: <sup>1</sup>H NMR of compound **6b** (500 MHz, CDCl<sub>3</sub>).

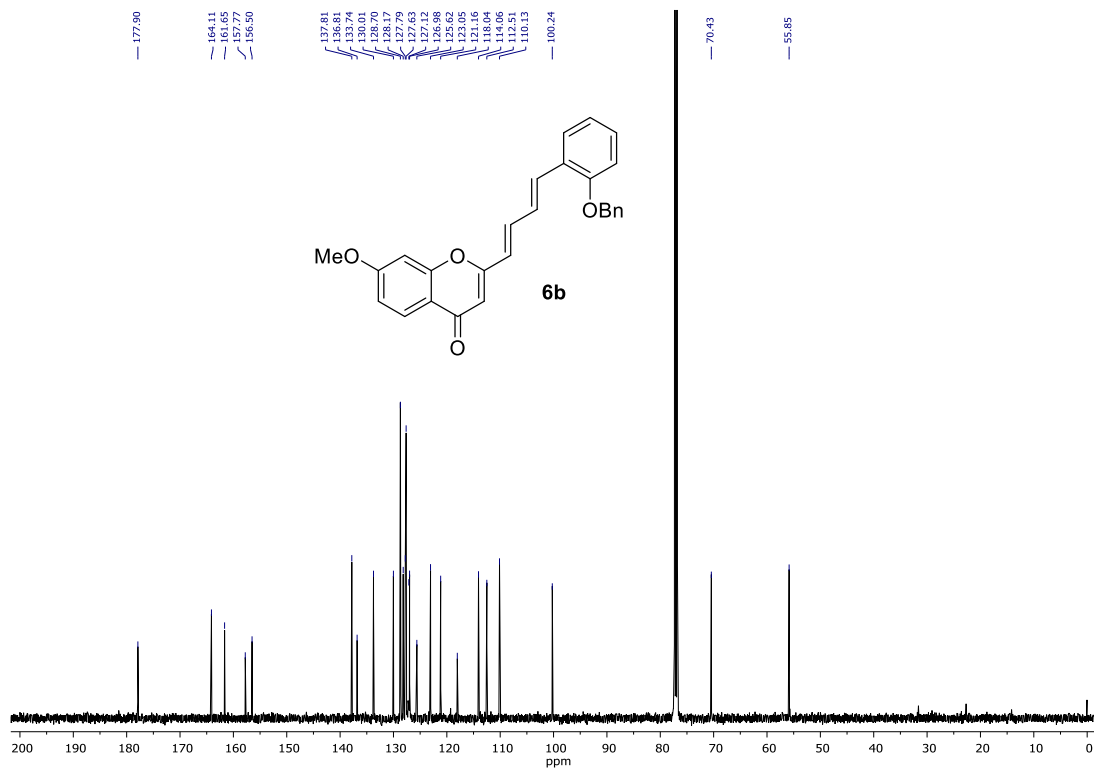

Figure S14: <sup>13</sup>C NMR of compound **6b** (125 MHz, CDCl<sub>3</sub>).

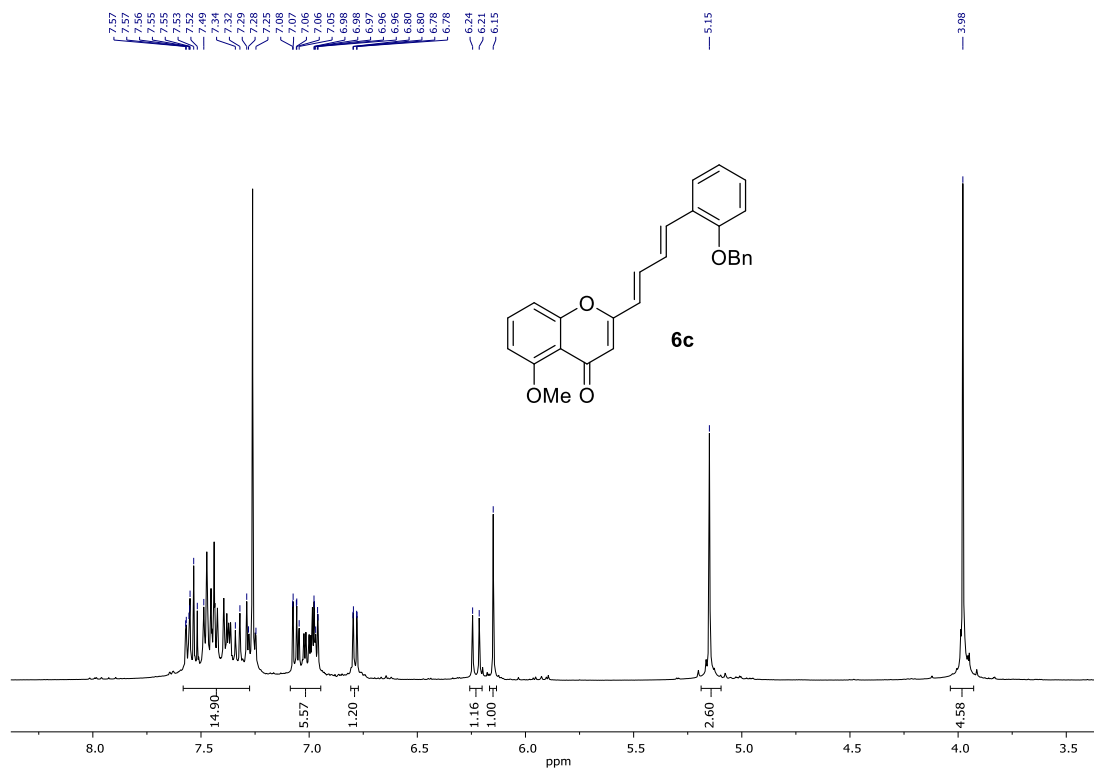

Figure S15: <sup>1</sup>H NMR of compound **6c** (500 MHz, CDCl<sub>3</sub>).

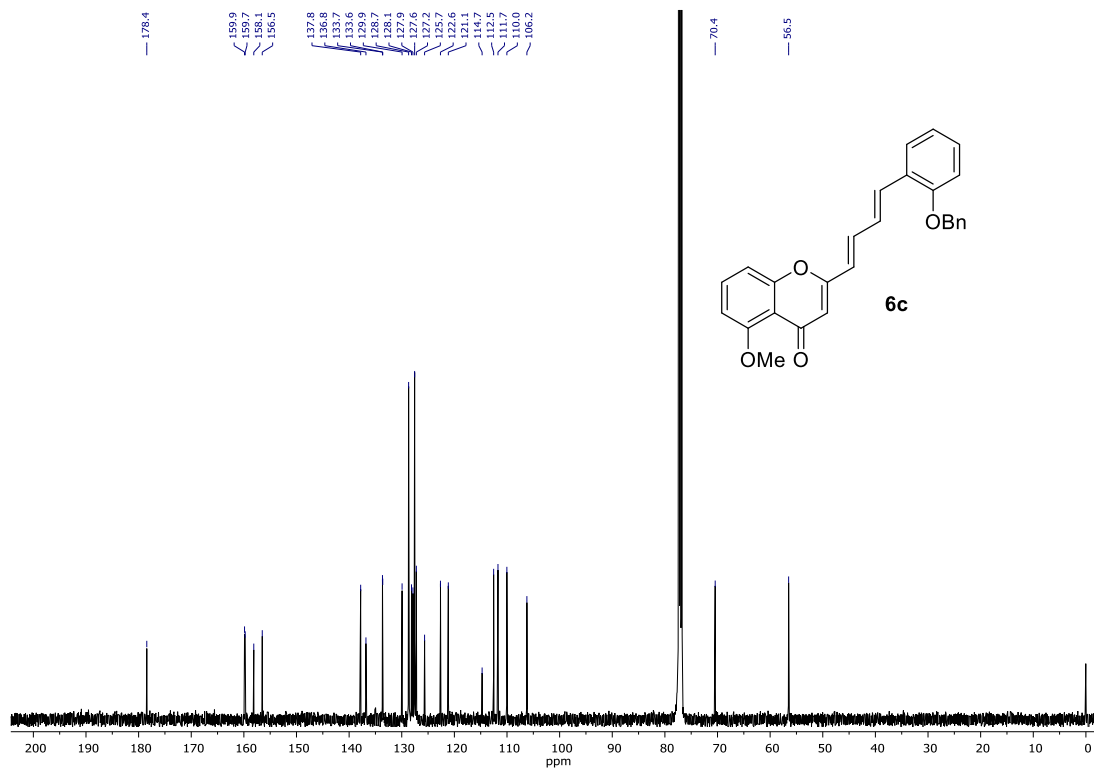

Figure S16: <sup>13</sup>C NMR of compound **6c** (125 MHz, CDCl<sub>3</sub>).

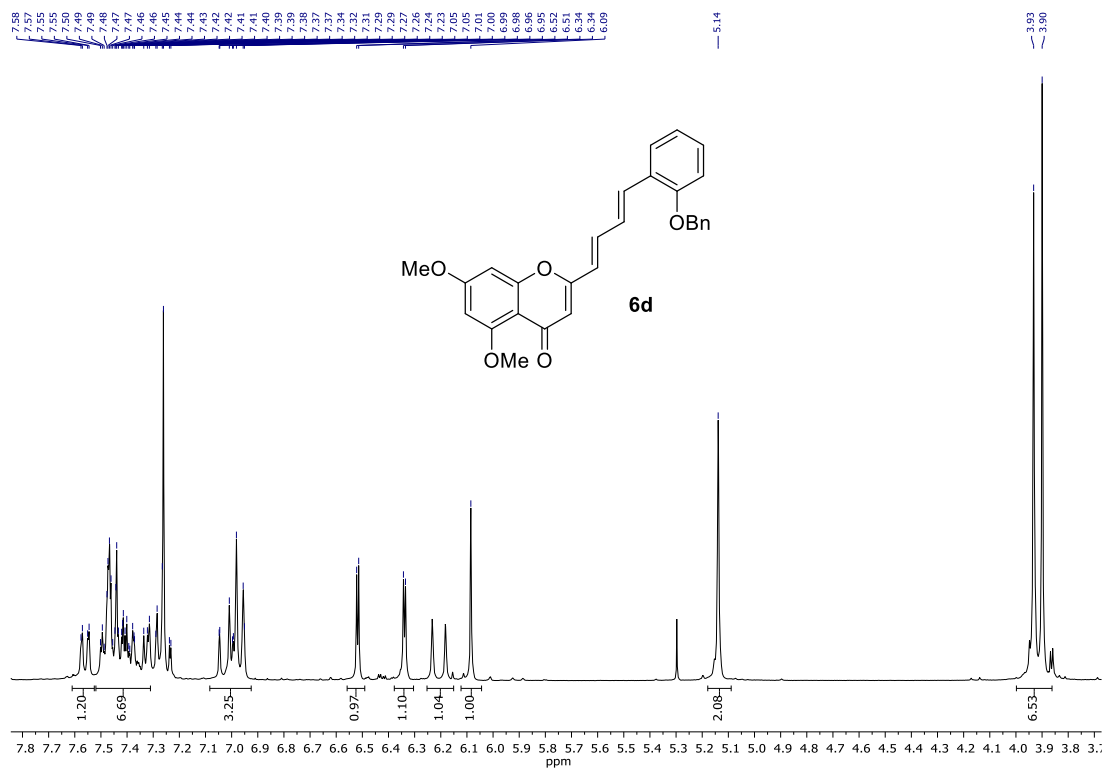

Figure S17: <sup>1</sup>H NMR of compound **6d** (300 MHz, CDCl<sub>3</sub>).

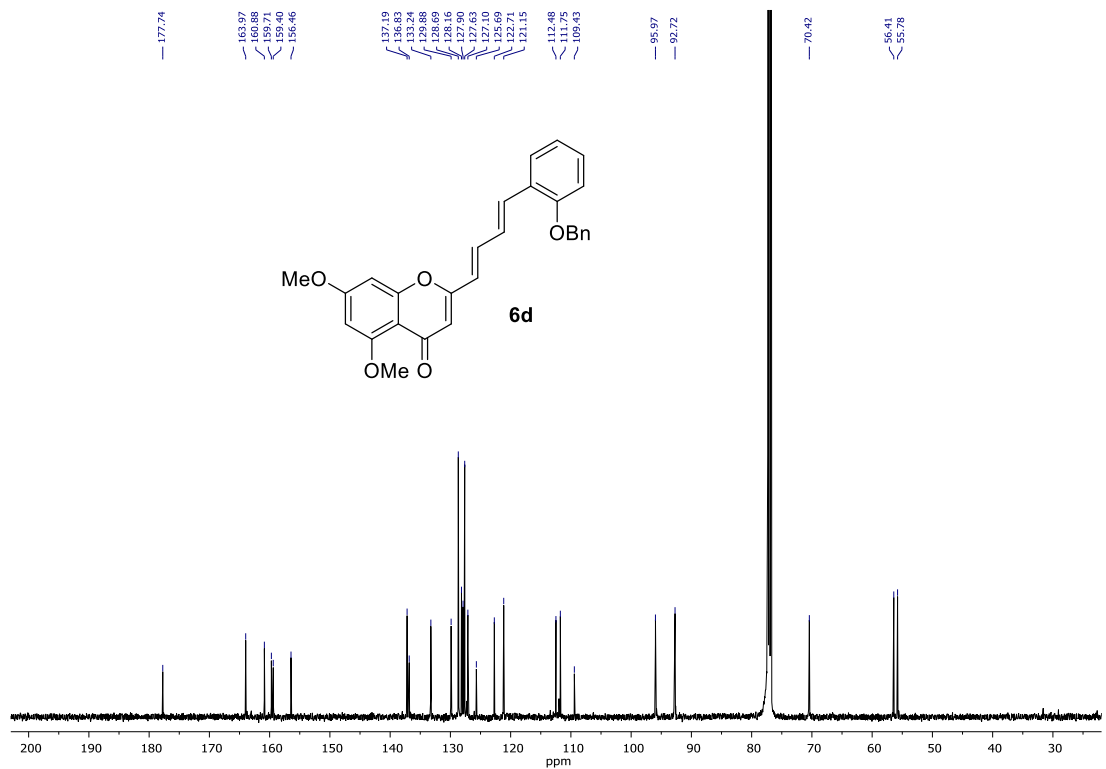

Figure S18: <sup>13</sup>C NMR of compound **6d** (125 MHz, CDCl<sub>3</sub>).

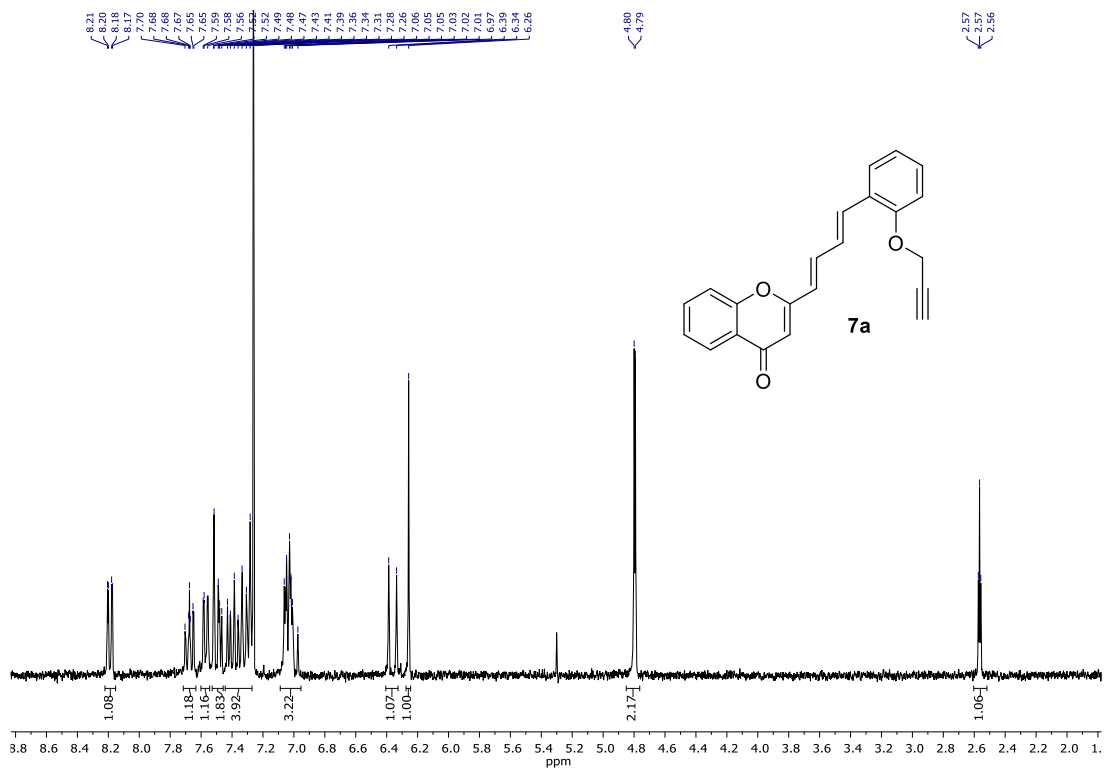

Figure S19: <sup>1</sup>H NMR of compound **7a** (300 MHz, CDCl<sub>3</sub>).

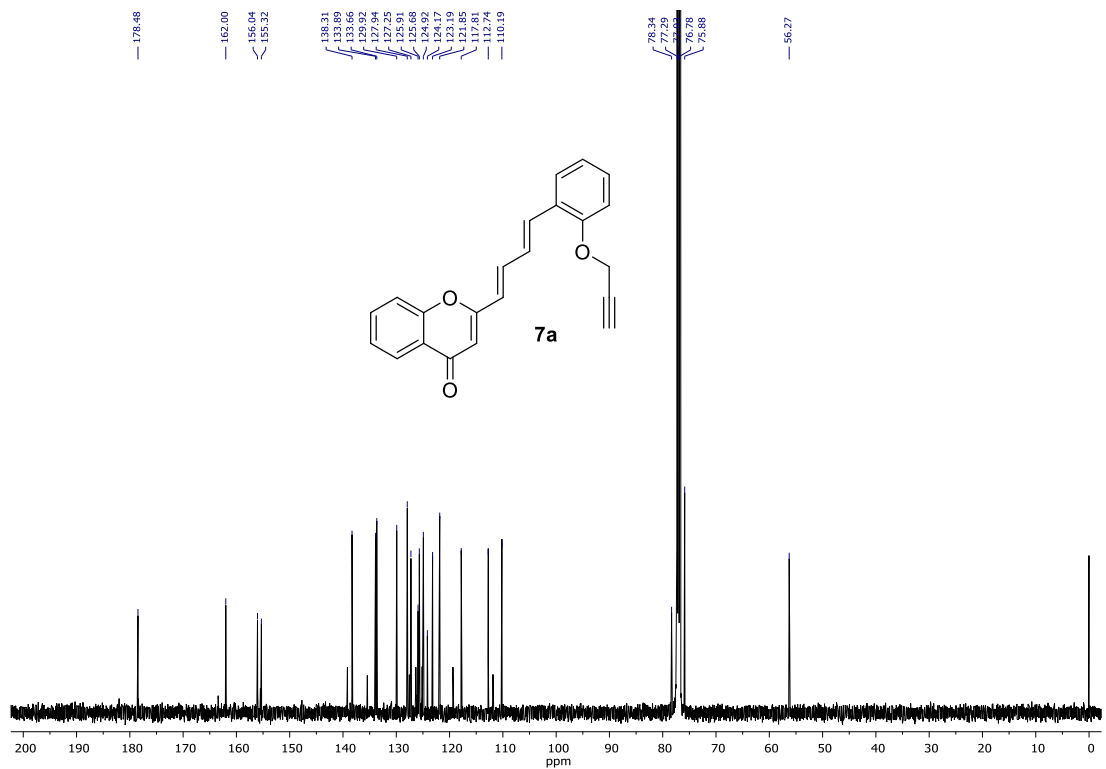

Figure S20: <sup>13</sup>C NMR of compound **7a** (125 MHz, CDCl<sub>3</sub>).

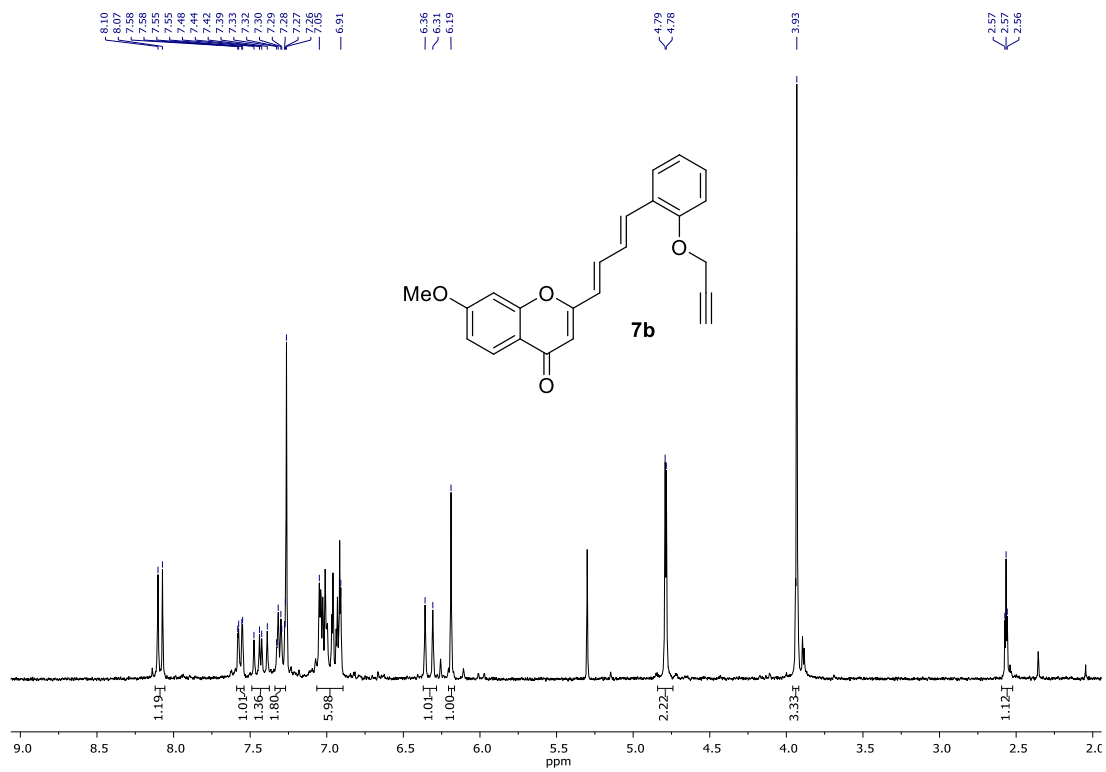

Figure S21: <sup>1</sup>H NMR of compound **7b** (300 MHz, CDCl<sub>3</sub>).

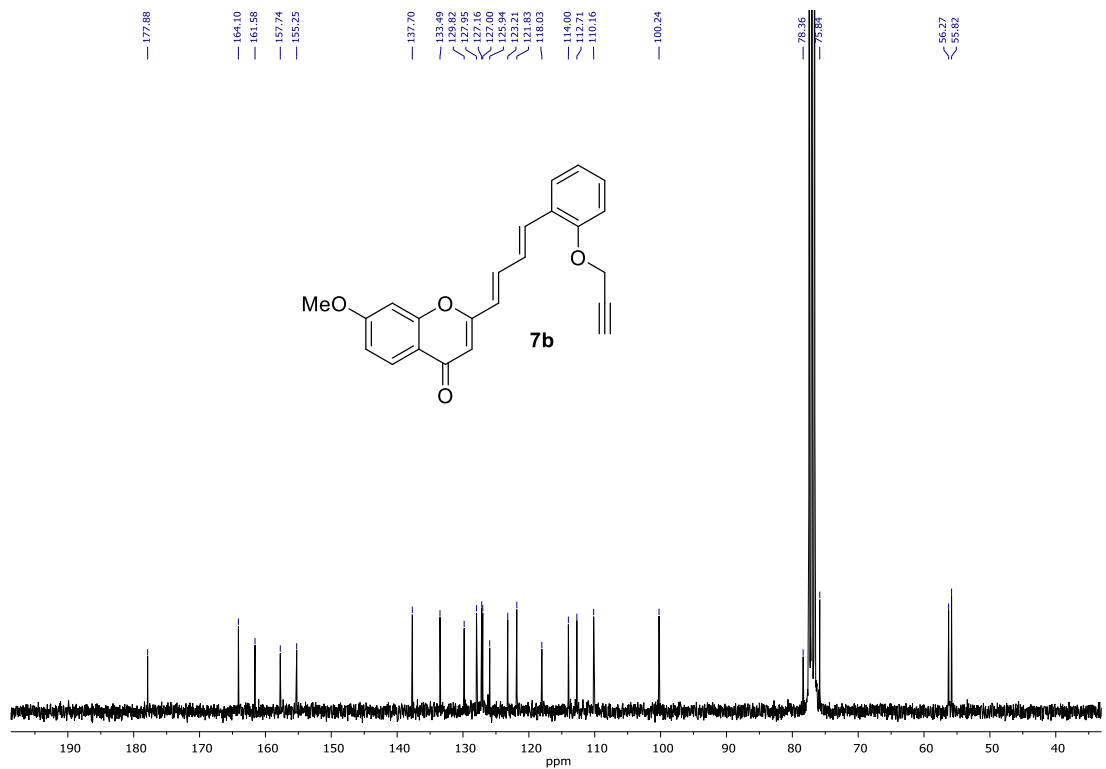

Figure S22: <sup>13</sup>C NMR of compound **7b** (75 MHz, CDCl<sub>3</sub>).

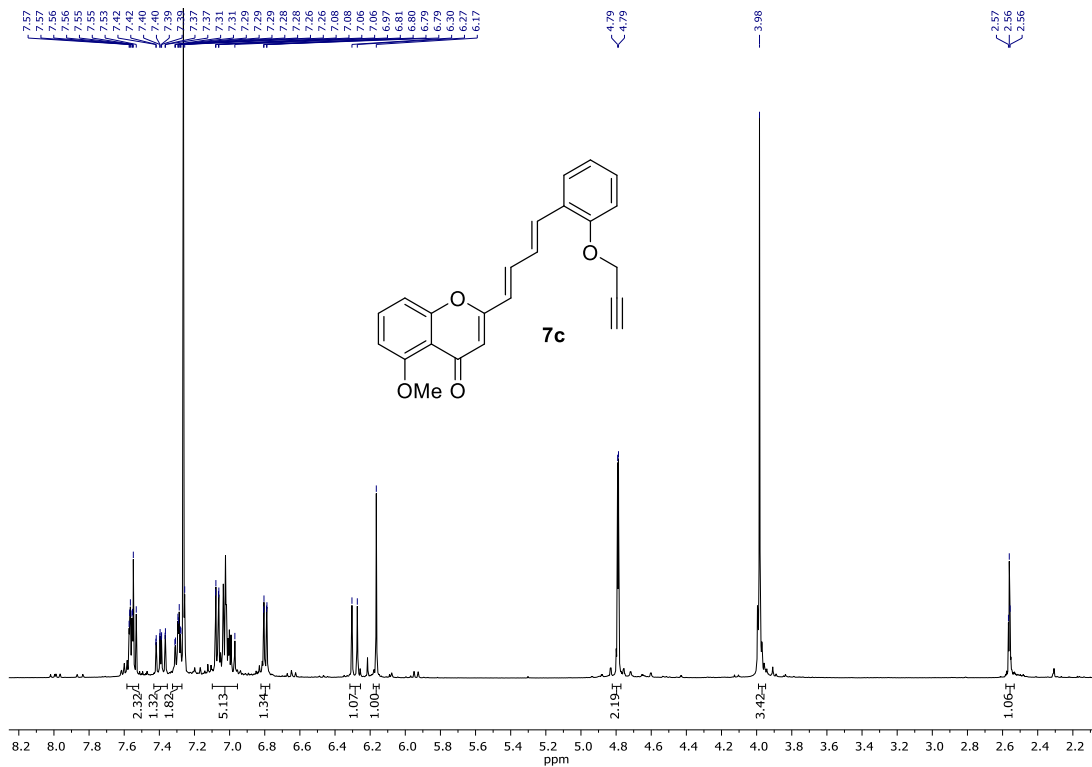

Figure S23:  $^1\text{H}$  NMR of compound **7c** (500 MHz,  $\text{CDCl}_3$ ).

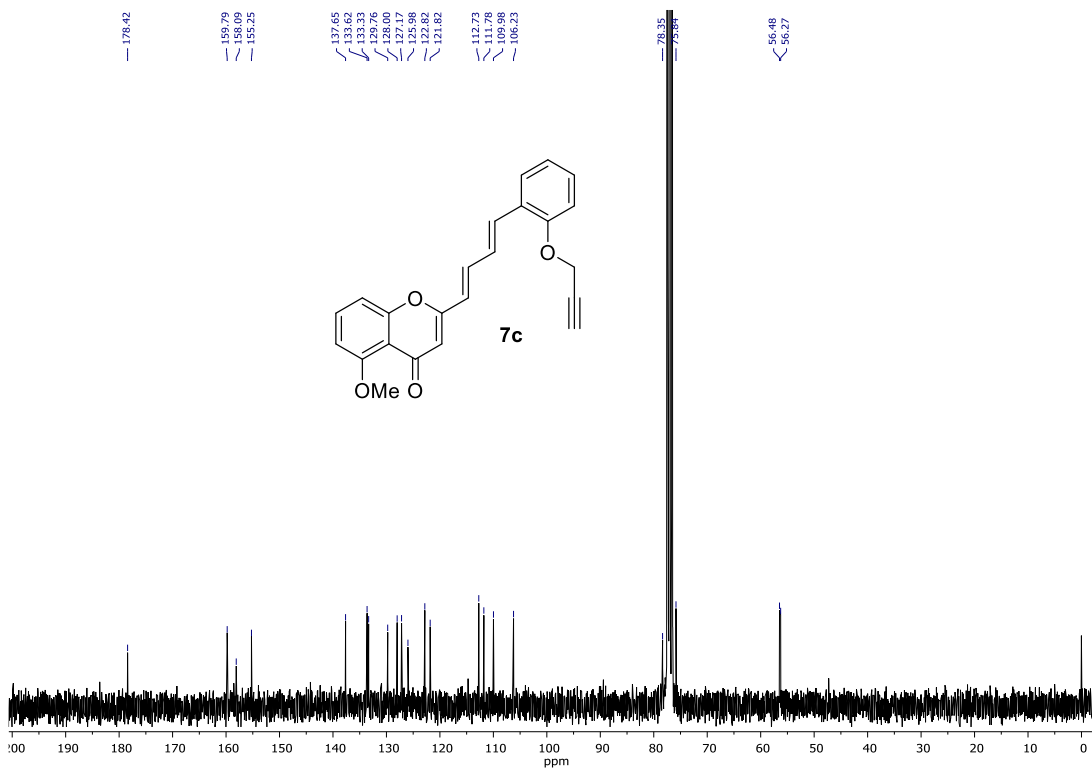

Figure S24:  $^{13}\text{C}$  NMR of compound **7c** (75 MHz,  $\text{CDCl}_3$ ).

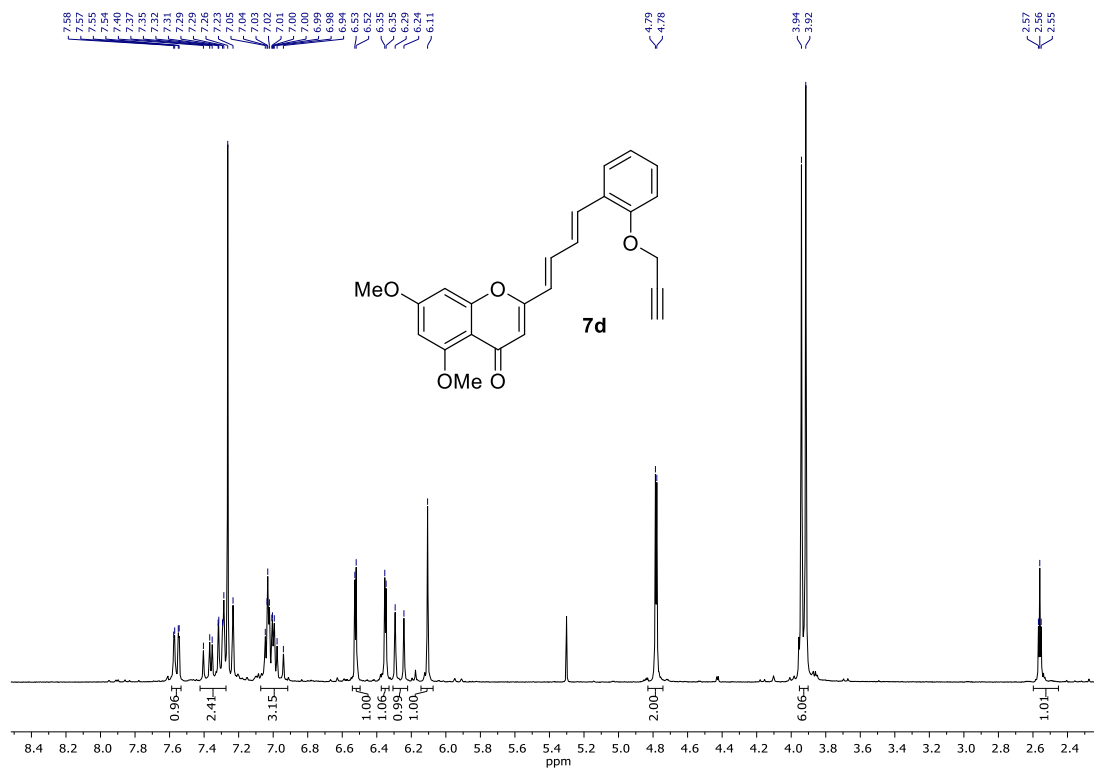

Figure S25: <sup>1</sup>H NMR of compound **7d** (500 MHz, CDCl<sub>3</sub>).

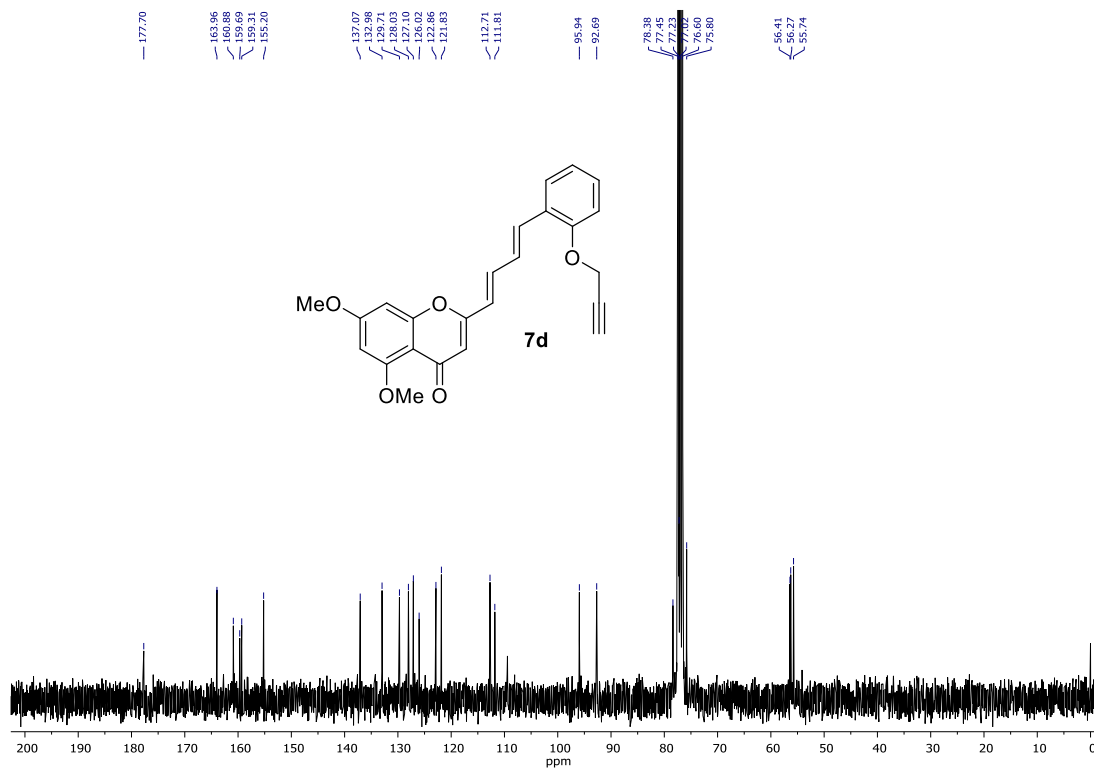

Figure S26: <sup>13</sup>C NMR of compound **7d** (75 MHz, CDCl<sub>3</sub>).

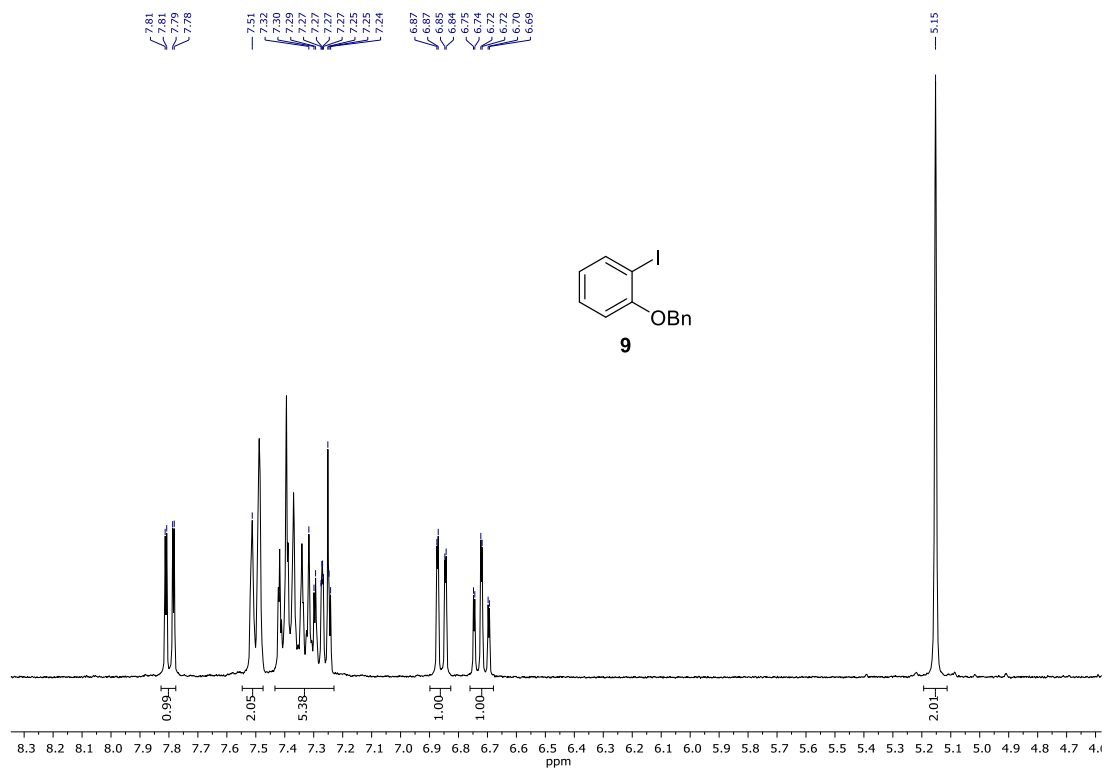

Figure S27: <sup>1</sup>H NMR of compound 9 (300 MHz, CDCl<sub>3</sub>).

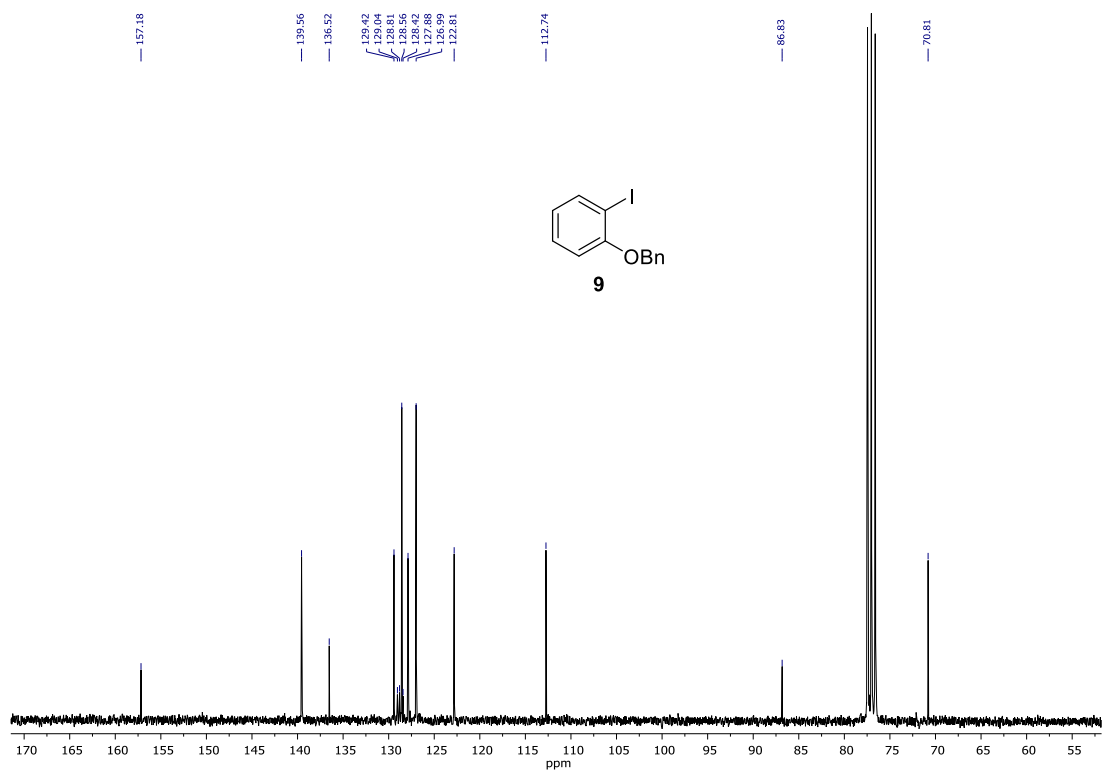

Figure S28: <sup>13</sup>C NMR of compound 9 (75 MHz, CDCl<sub>3</sub>).



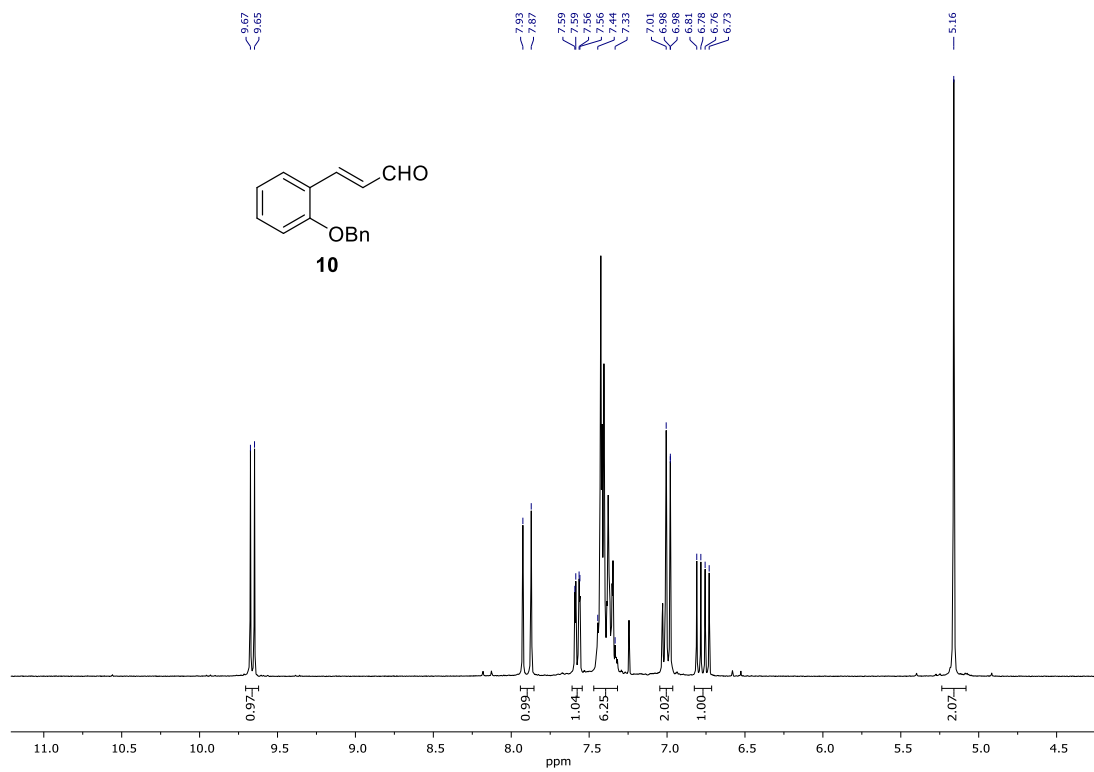

Figure S29: <sup>1</sup>H NMR of compound **10** (300 MHz, CDCl<sub>3</sub>).

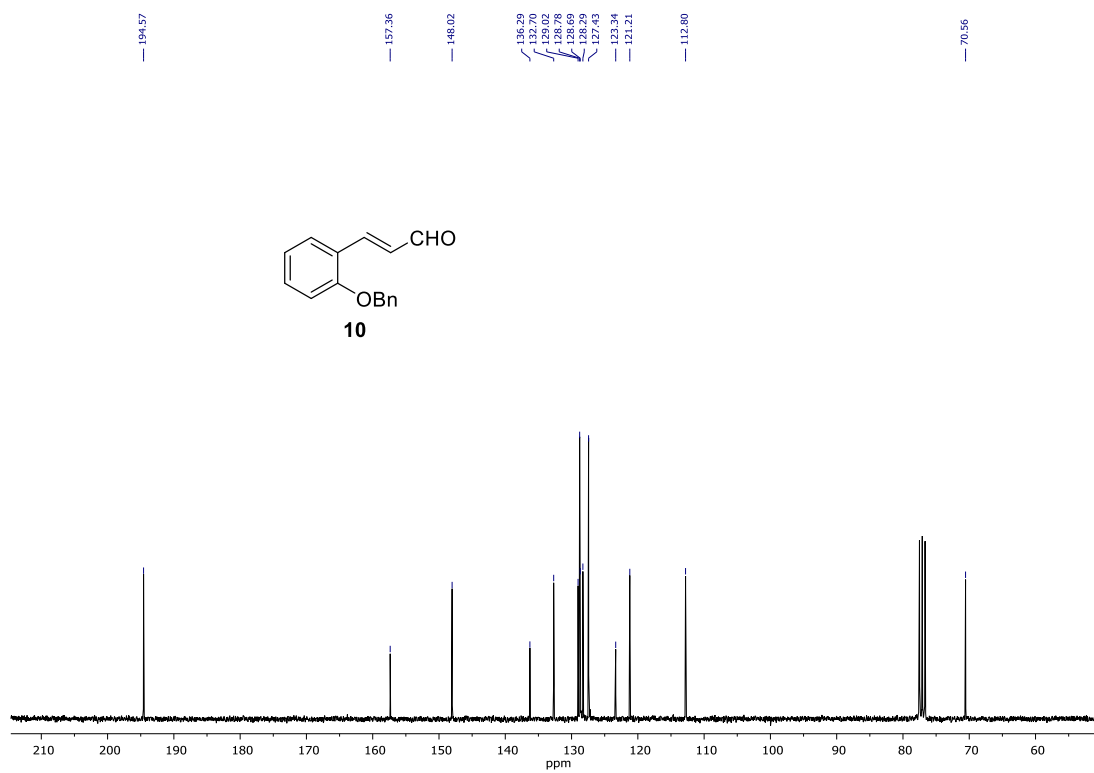

Figure S30: <sup>13</sup>C NMR of compound **10** (75 MHz, CDCl<sub>3</sub>).

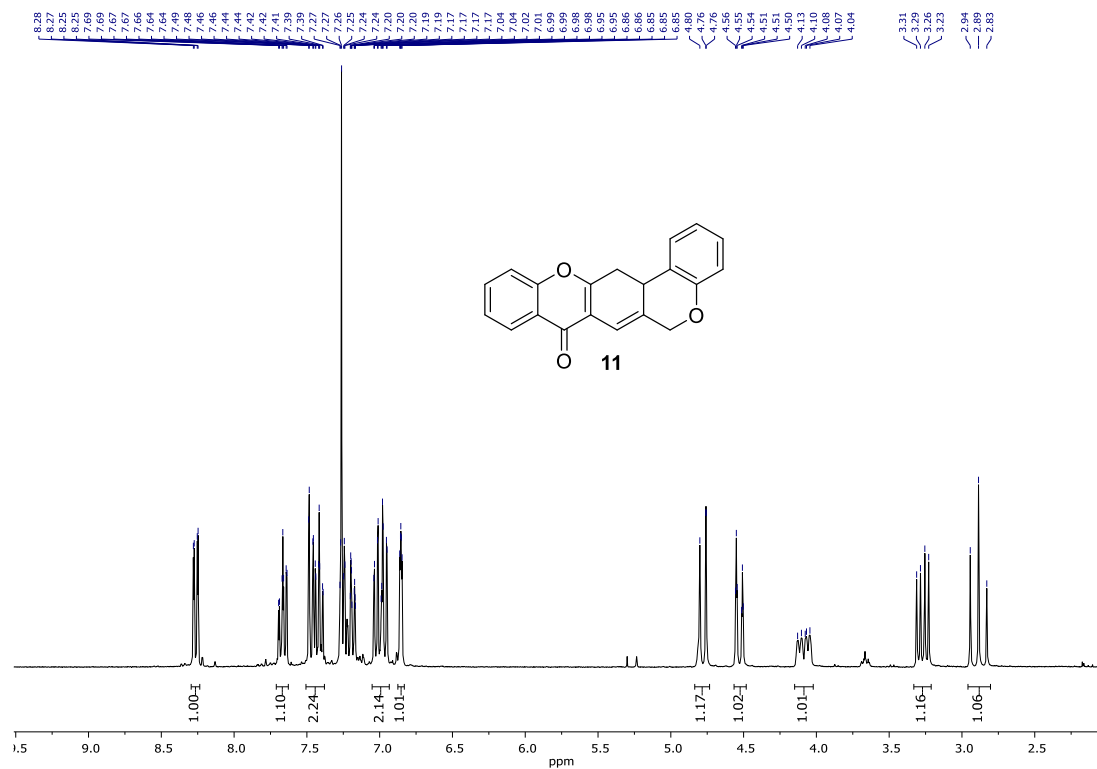

Figure S31: <sup>1</sup>H NMR of compound **11** (300 MHz, CDCl<sub>3</sub>).

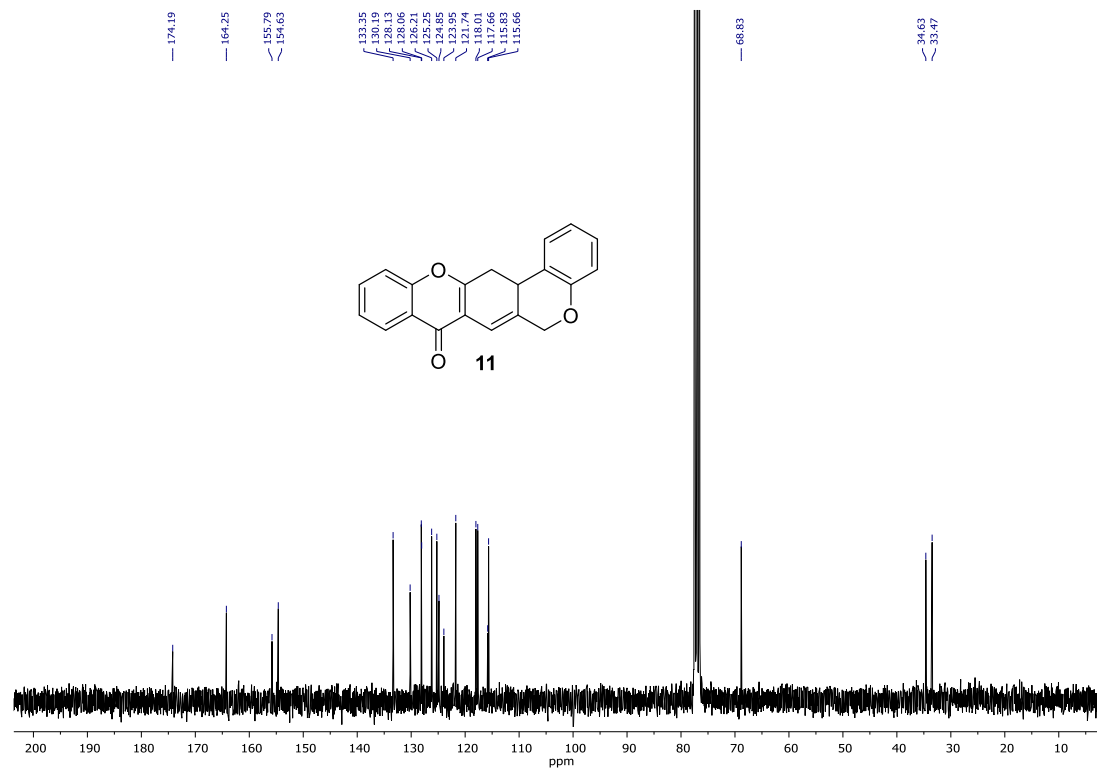

Figure S32: <sup>13</sup>C NMR of compound **11** (75 MHz, CDCl<sub>3</sub>).

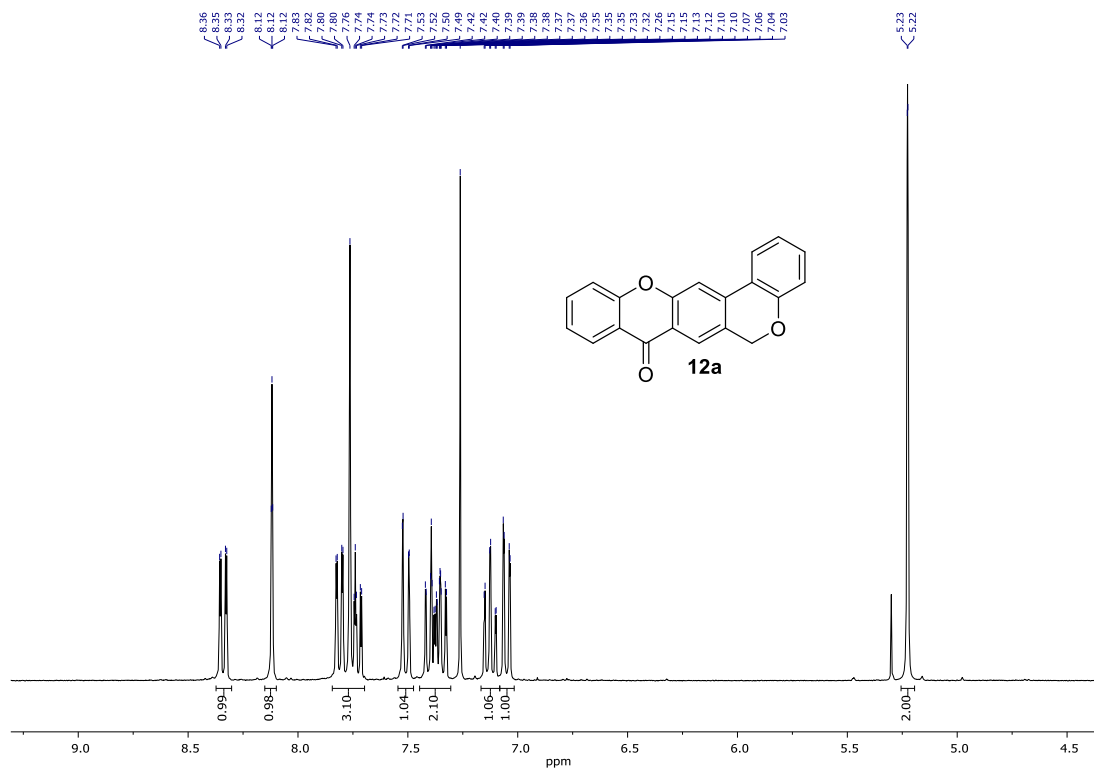

Figure S33: <sup>1</sup>H NMR of compound 12a (300 MHz, CDCl<sub>3</sub>).

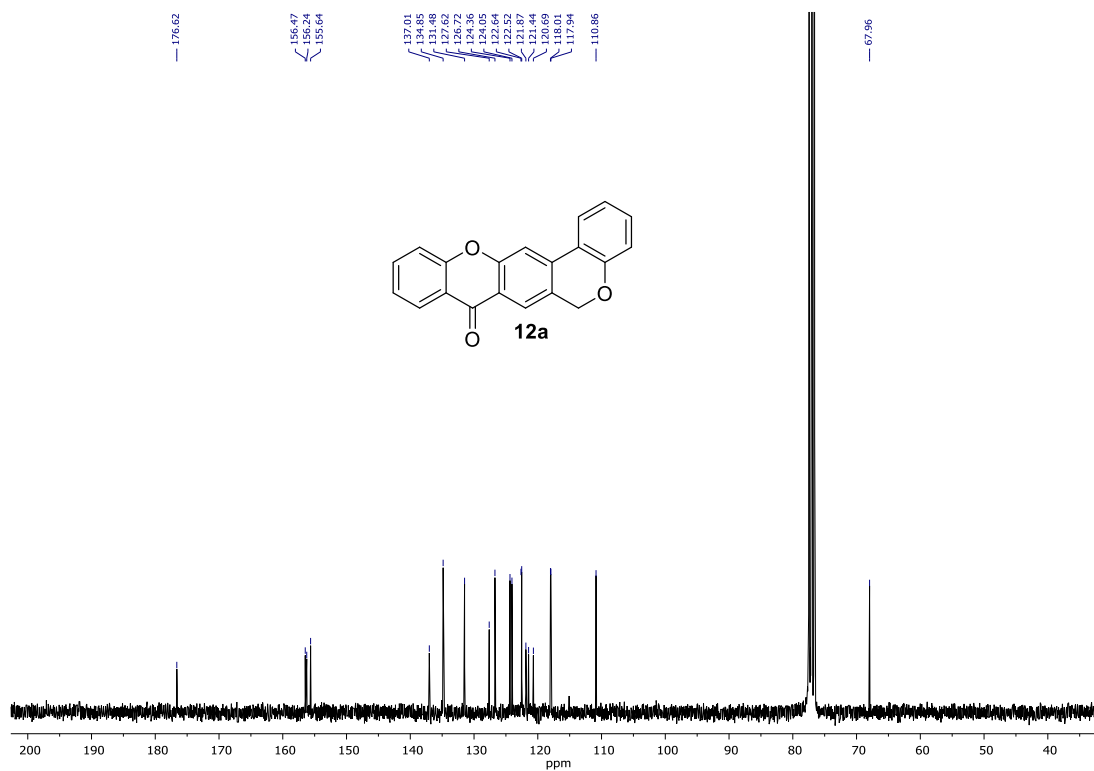

Figure S34: <sup>13</sup>C NMR of compound 12a (75 MHz, CDCl<sub>3</sub>).

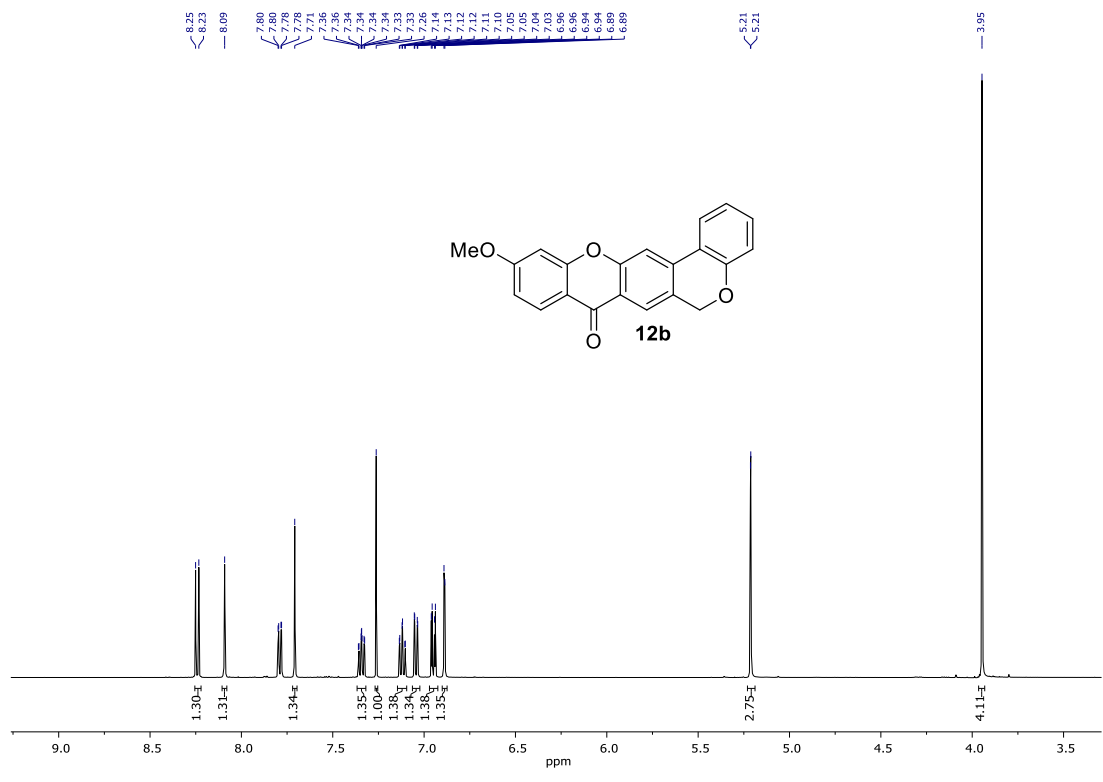

Figure S35: <sup>1</sup>H NMR of compound **12b** (500 MHz, CDCl<sub>3</sub>).

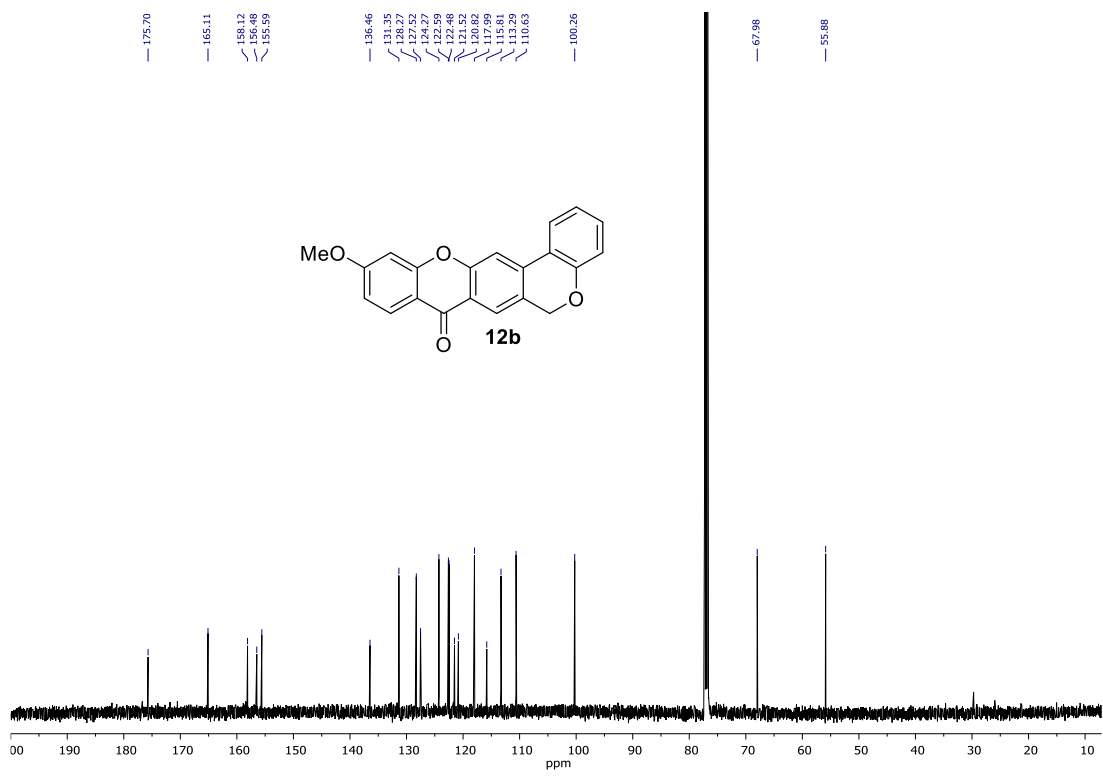

Figure S36: <sup>13</sup>C NMR of compound **12b** (125 MHz, CDCl<sub>3</sub>).

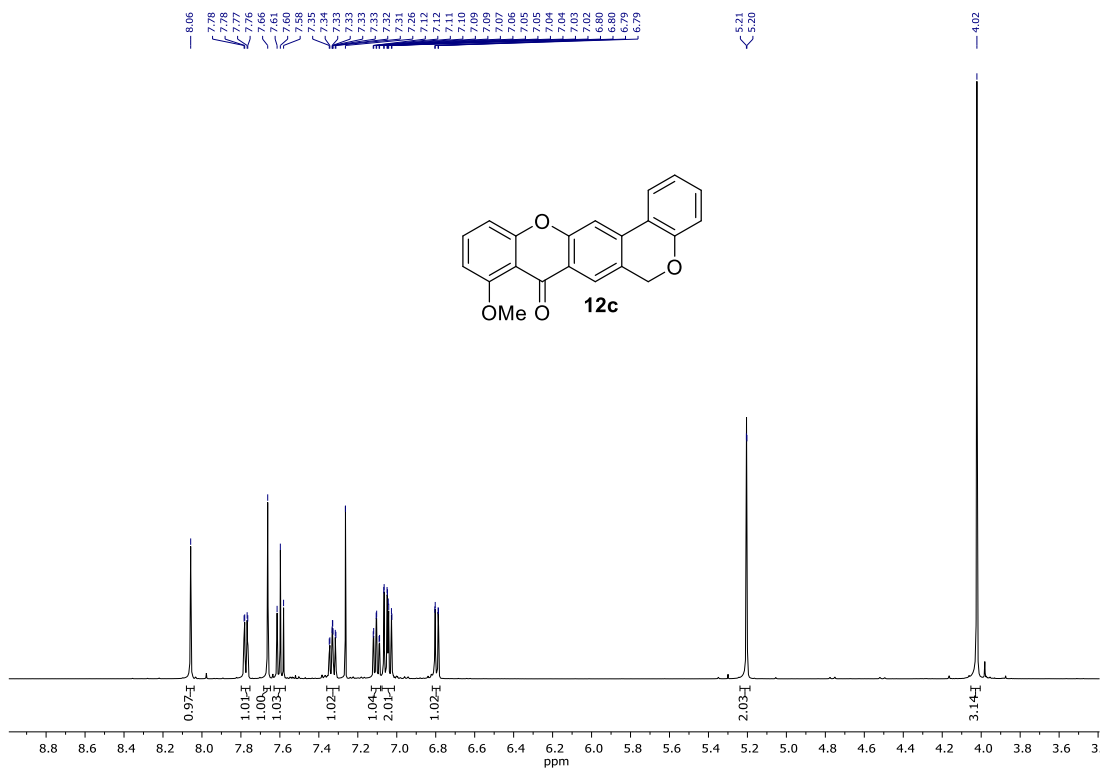

Figure S37:  $^1\text{H}$  NMR of compound **12c** (500 MHz,  $\text{CDCl}_3$ ).

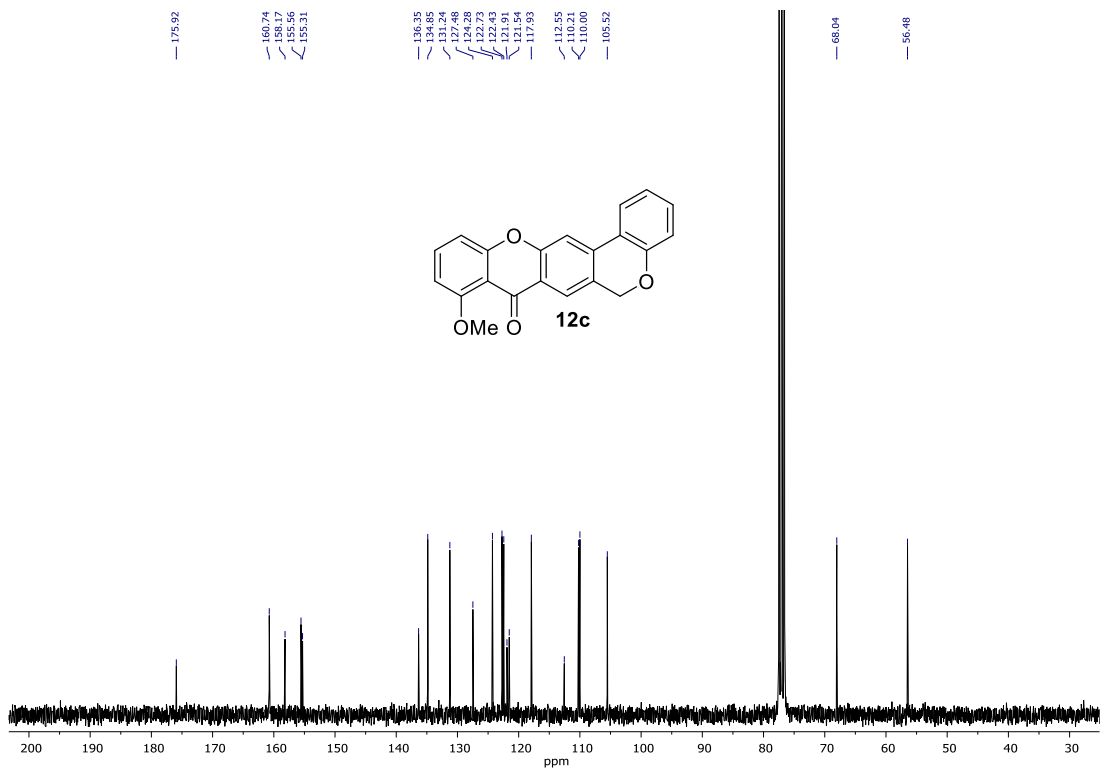

Figure S38:  $^{13}\text{C}$  NMR of compound **12c** (75 MHz,  $\text{CDCl}_3$ ).

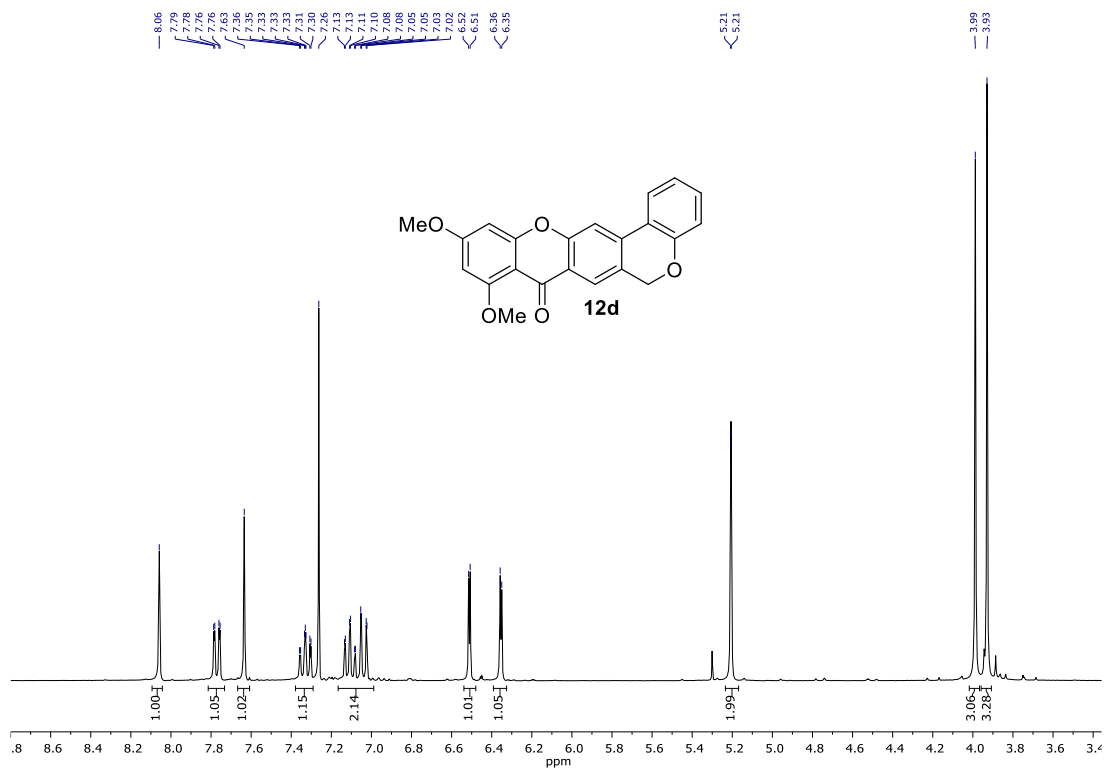

Figure S39: <sup>1</sup>H NMR of compound **12d** (300 MHz, CDCl<sub>3</sub>).

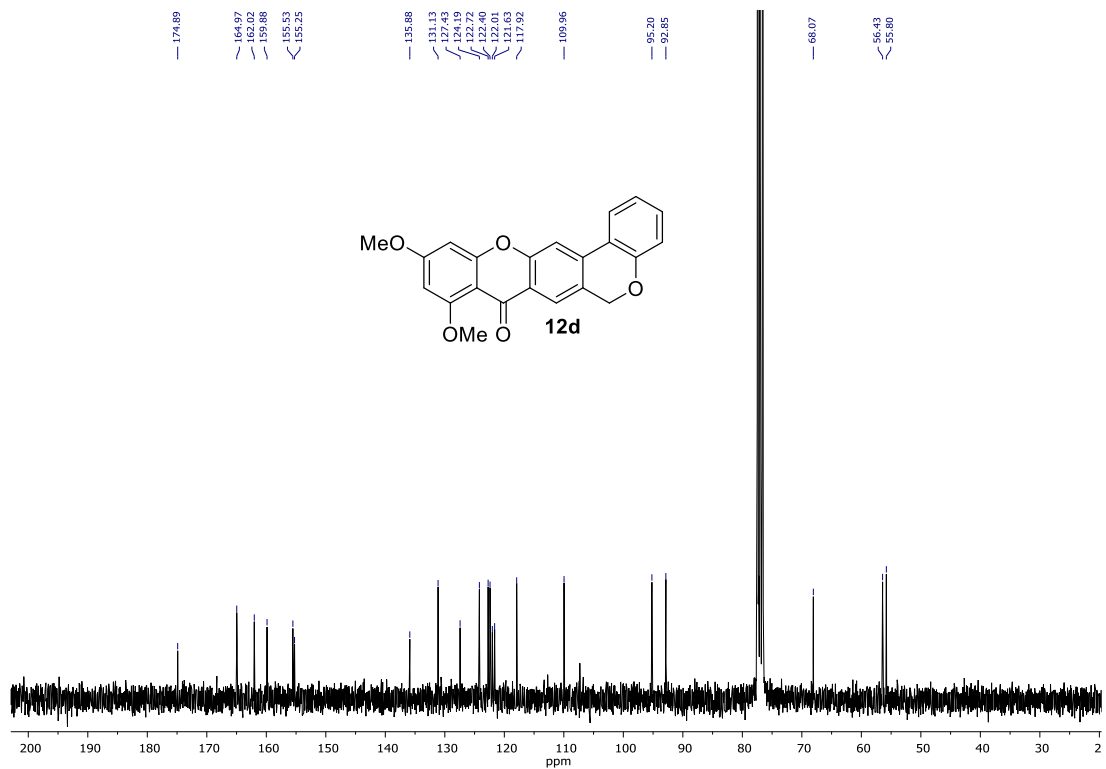

Figure S40: <sup>13</sup>C NMR of compound **12d** (75 MHz, CDCl<sub>3</sub>).

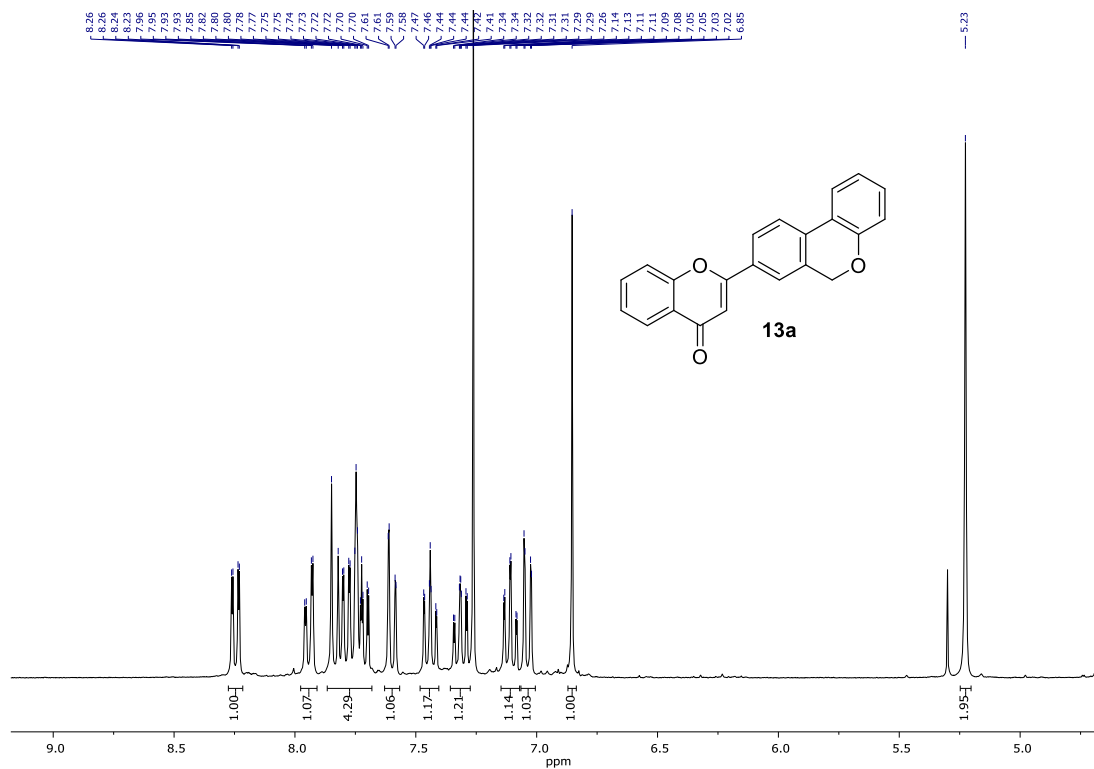

Figure S41: <sup>1</sup>H NMR of compound **13a** (300 MHz, CDCl<sub>3</sub>).

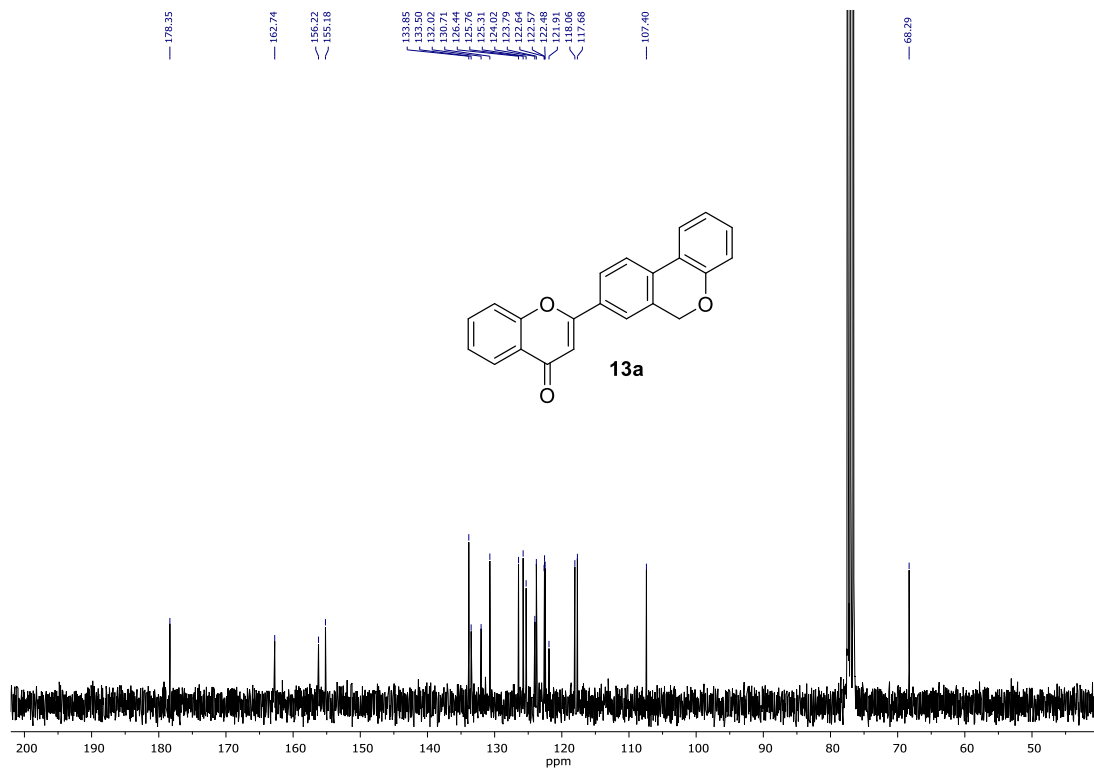

Figure S42: <sup>13</sup>C NMR of compound **13a** (75 MHz, CDCl<sub>3</sub>).

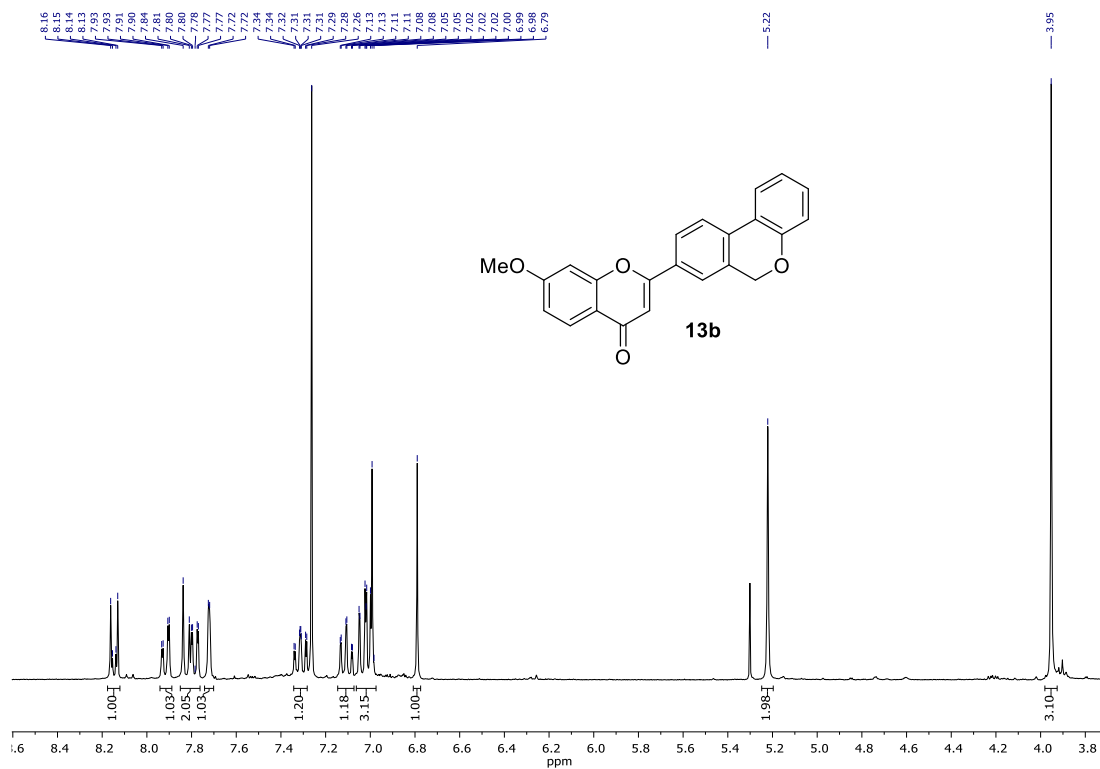

Figure S43: <sup>1</sup>H NMR of compound **13b** (300 MHz, CDCl<sub>3</sub>).

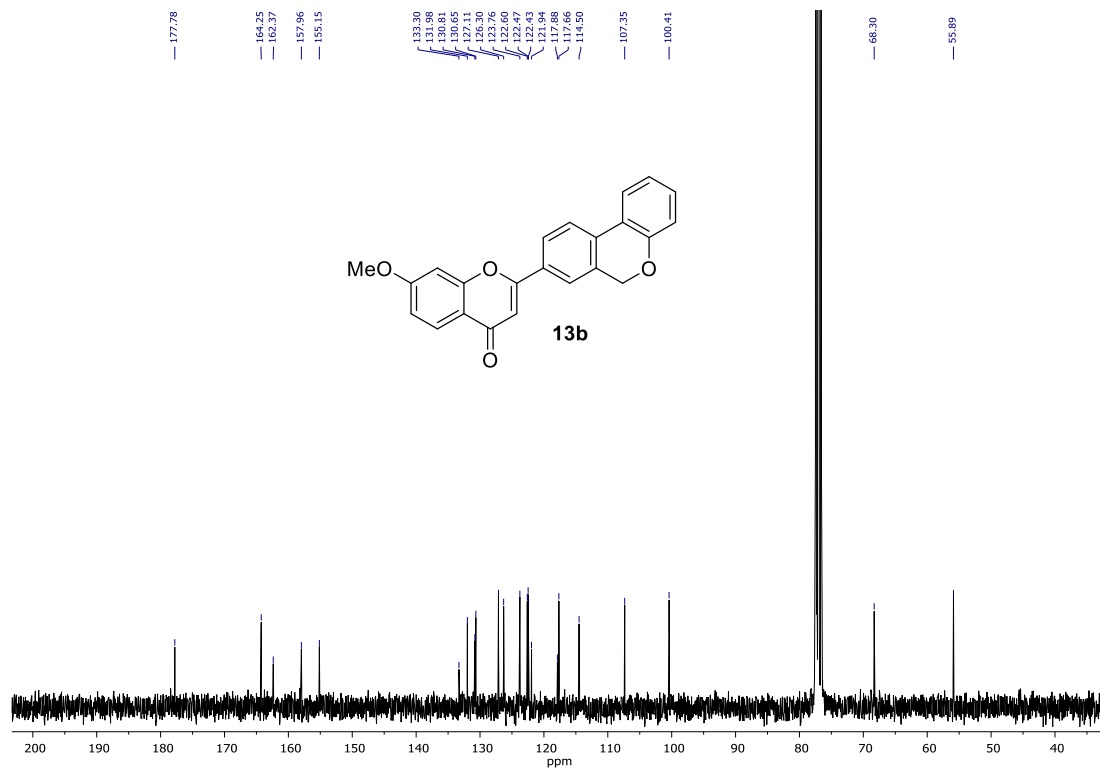

Figure S44: <sup>13</sup>C NMR of compound **13b** (75 MHz, CDCl<sub>3</sub>).



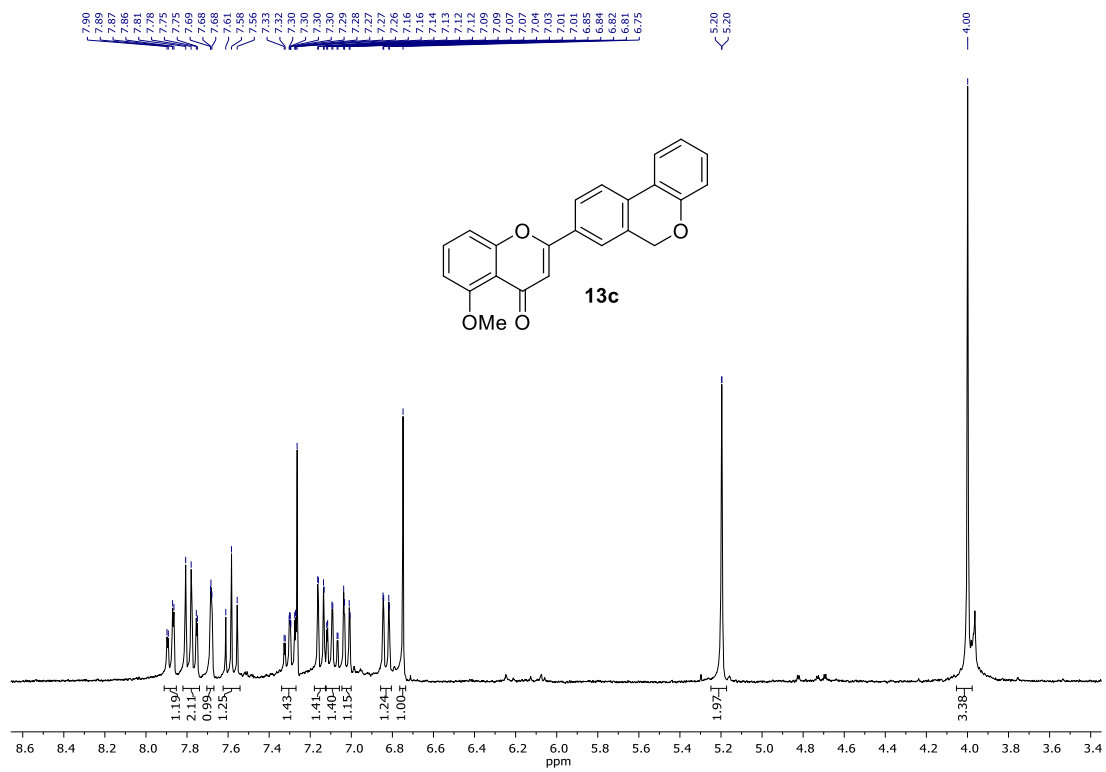

Figure S45: <sup>1</sup>H NMR of compound **13c** (300 MHz, CDCl<sub>3</sub>).

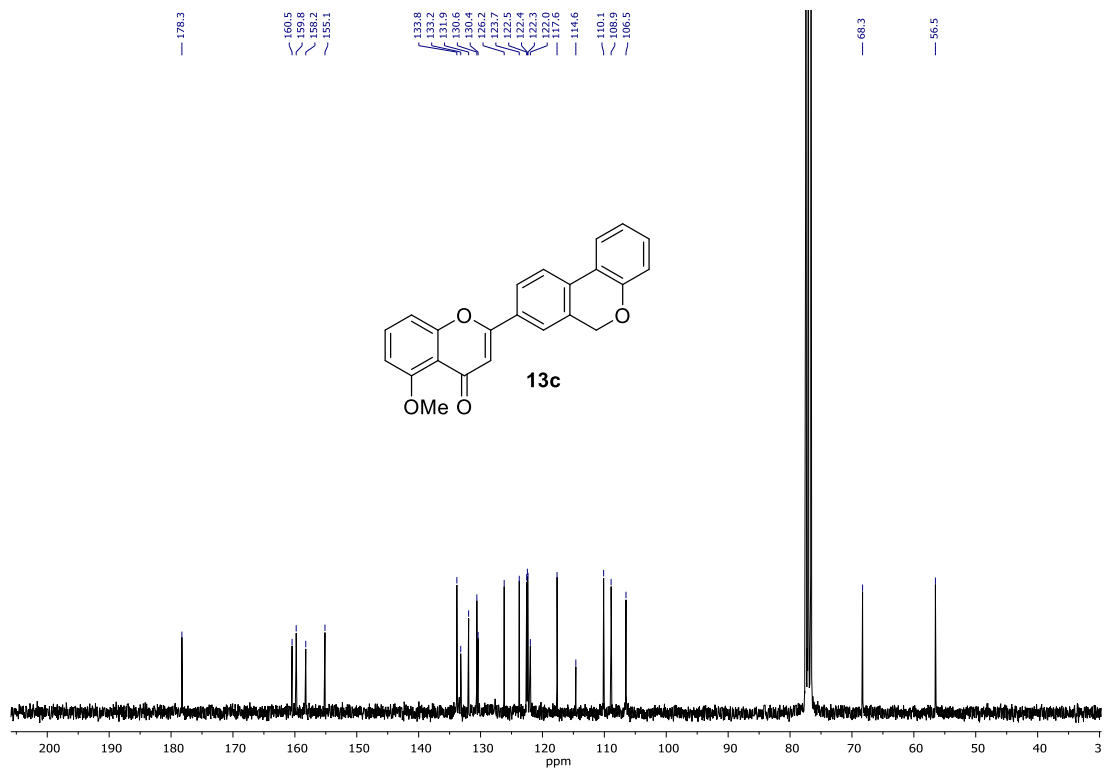

Figure S46: <sup>13</sup>C NMR of compound **13c** (75 MHz, CDCl<sub>3</sub>).

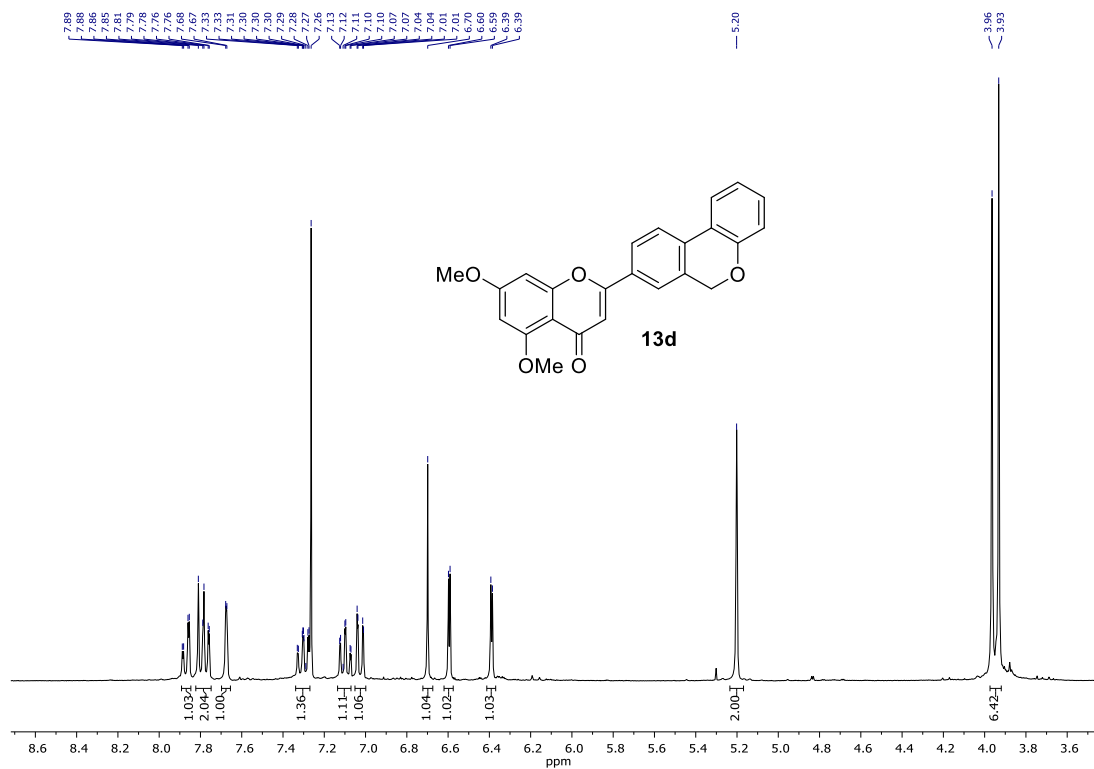

Figure S47: <sup>1</sup>H NMR of compound **13d** (300 MHz, CDCl<sub>3</sub>).

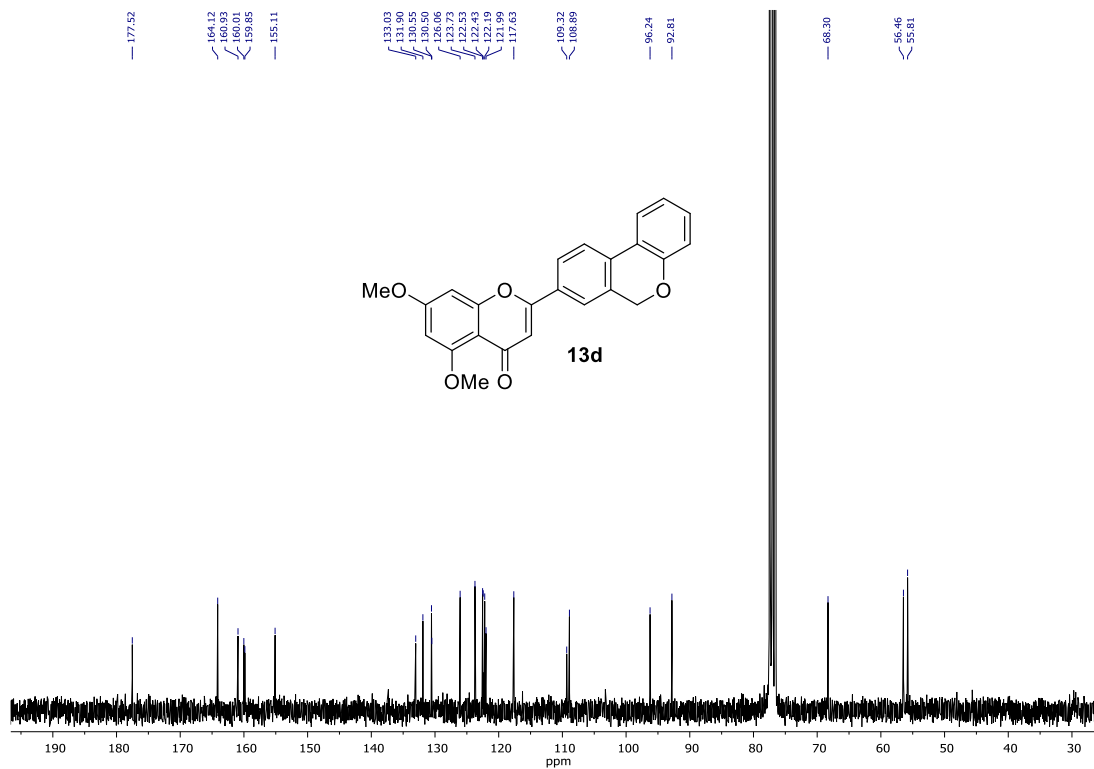

Figure S48: <sup>13</sup>C NMR of compound **13d** (75 MHz, CDCl<sub>3</sub>).

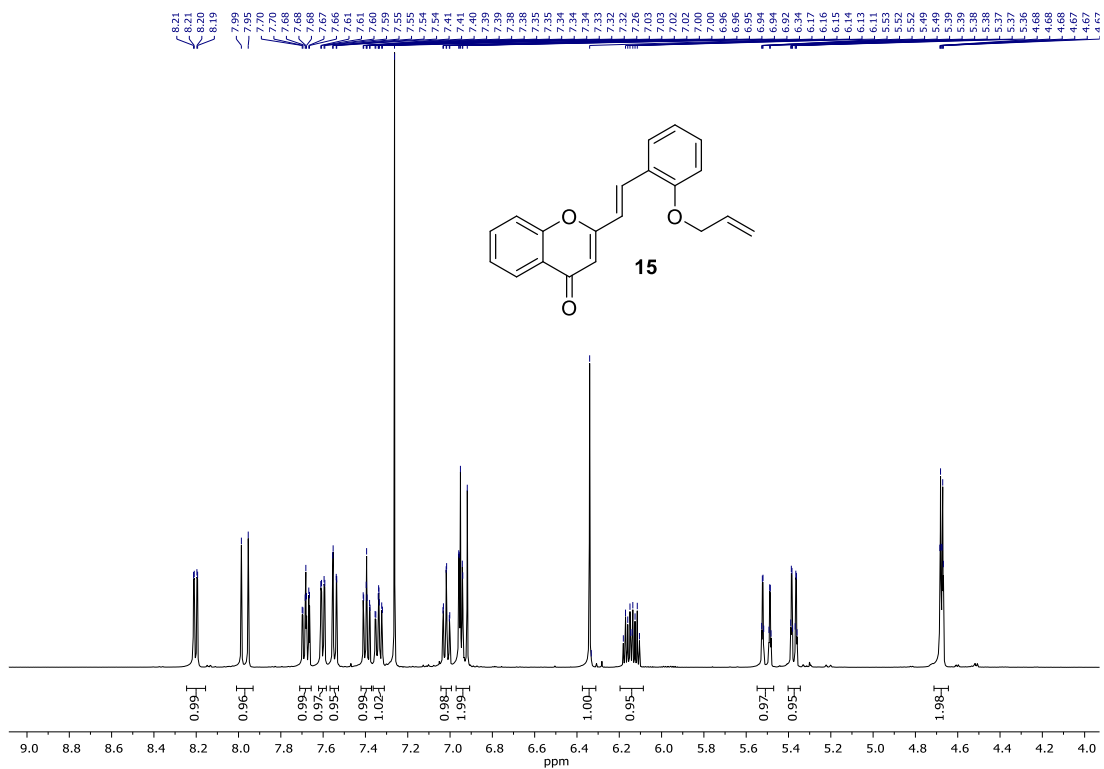

Figure S49: <sup>1</sup>H NMR of compound **15** (500 MHz, CDCl<sub>3</sub>).

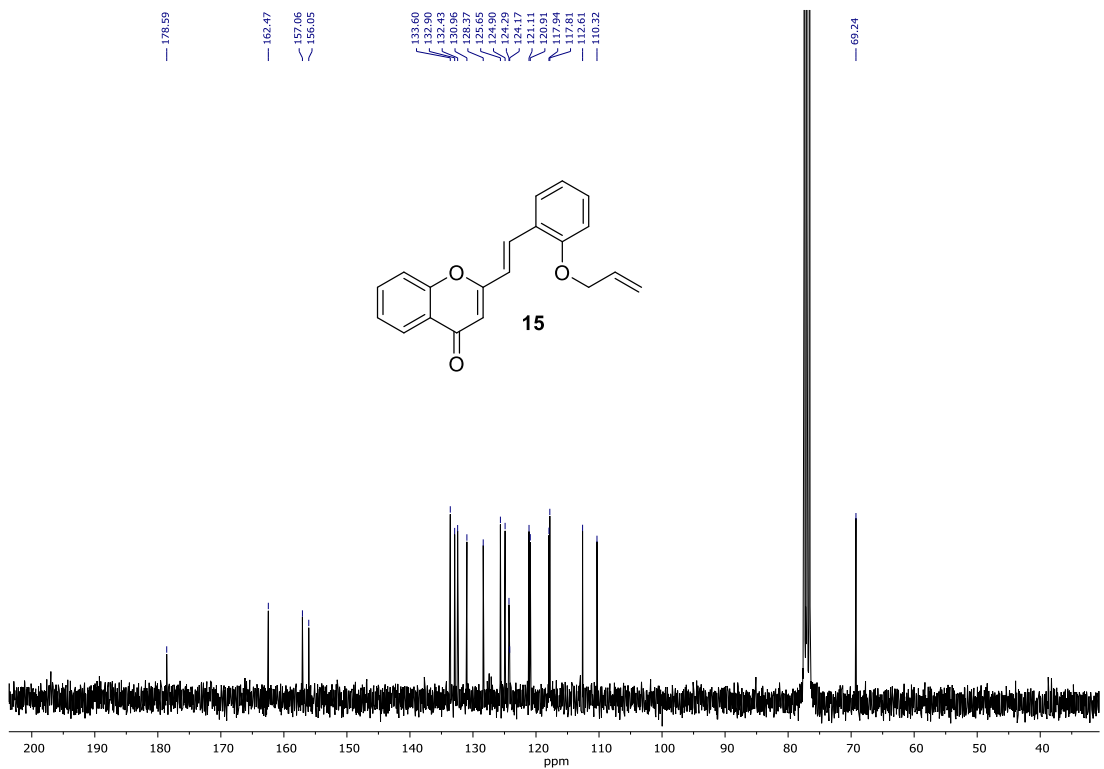

Figure S50: <sup>13</sup>C NMR of compound **15** (75 MHz, CDCl<sub>3</sub>).

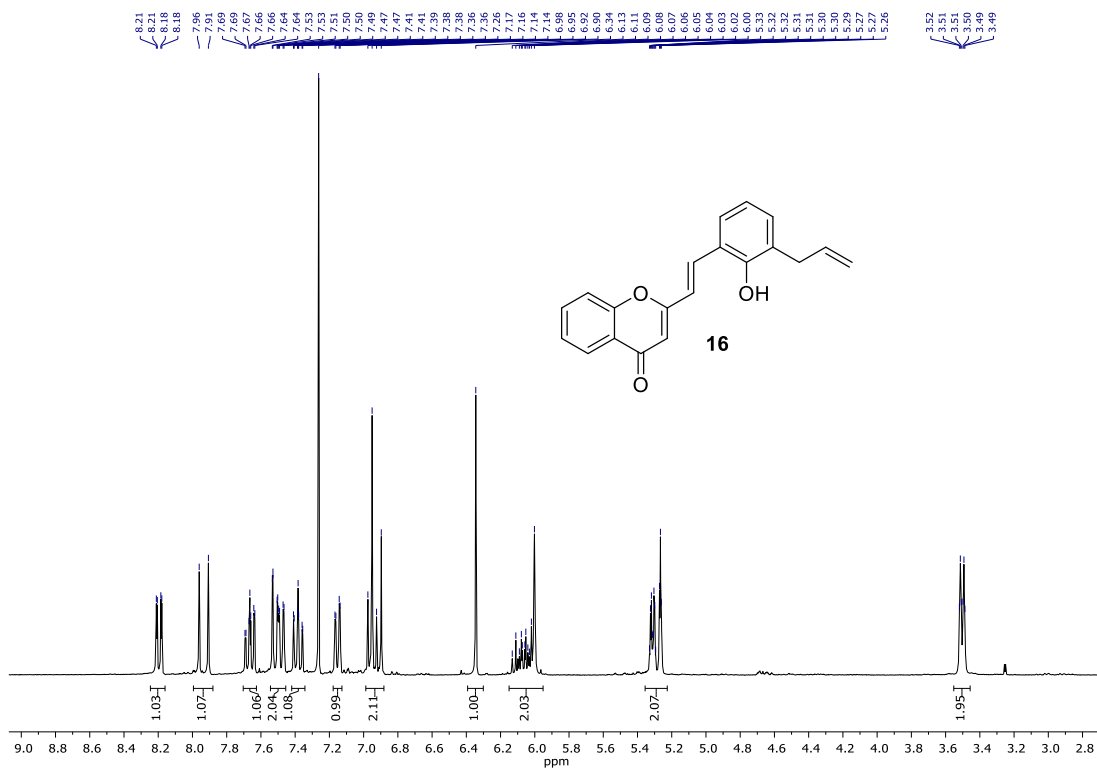

Figure S51: <sup>1</sup>H NMR of compound 16 (300 MHz, CDCl<sub>3</sub>).

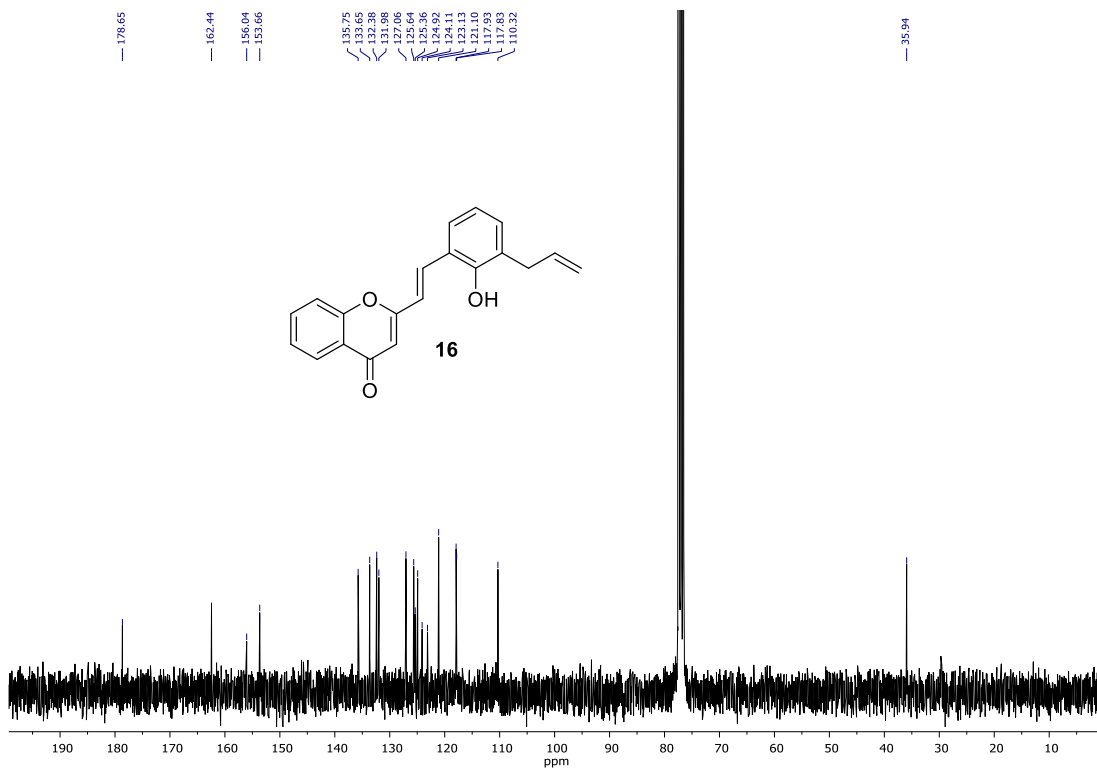

Figure S52: <sup>13</sup>C NMR of compound 16 (75 MHz, CDCl<sub>3</sub>).

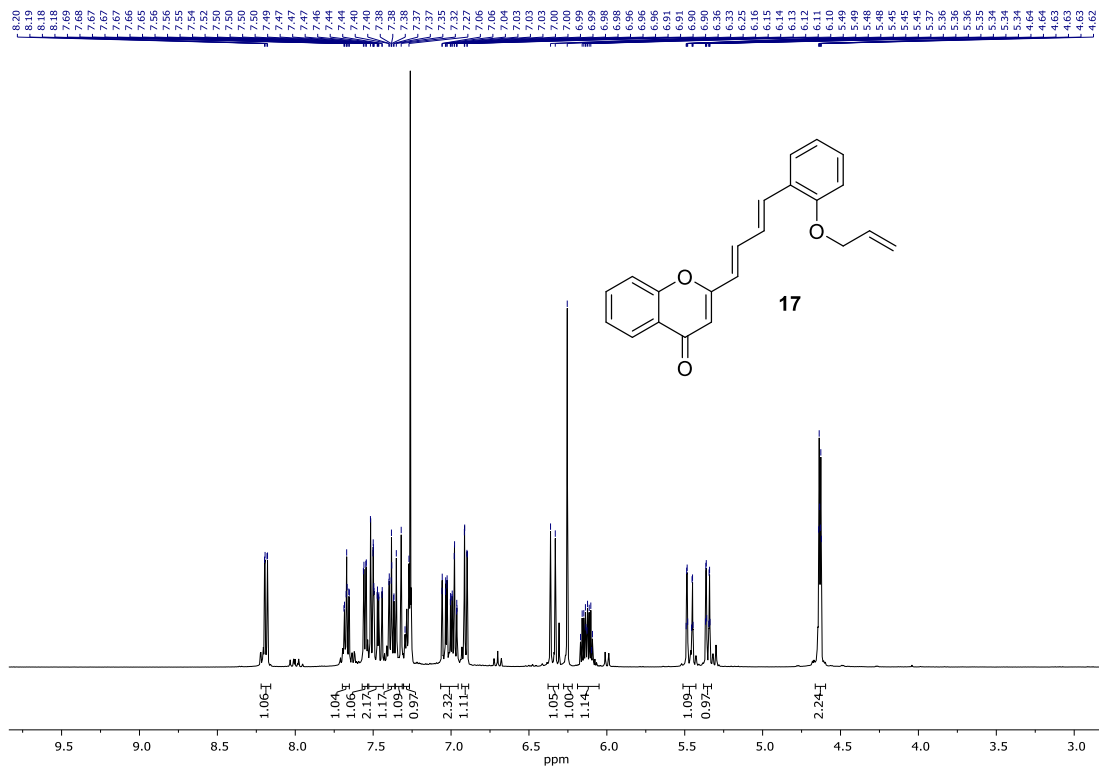

Figure S53: <sup>1</sup>H NMR of compound 17 (300 MHz, CDCl<sub>3</sub>).

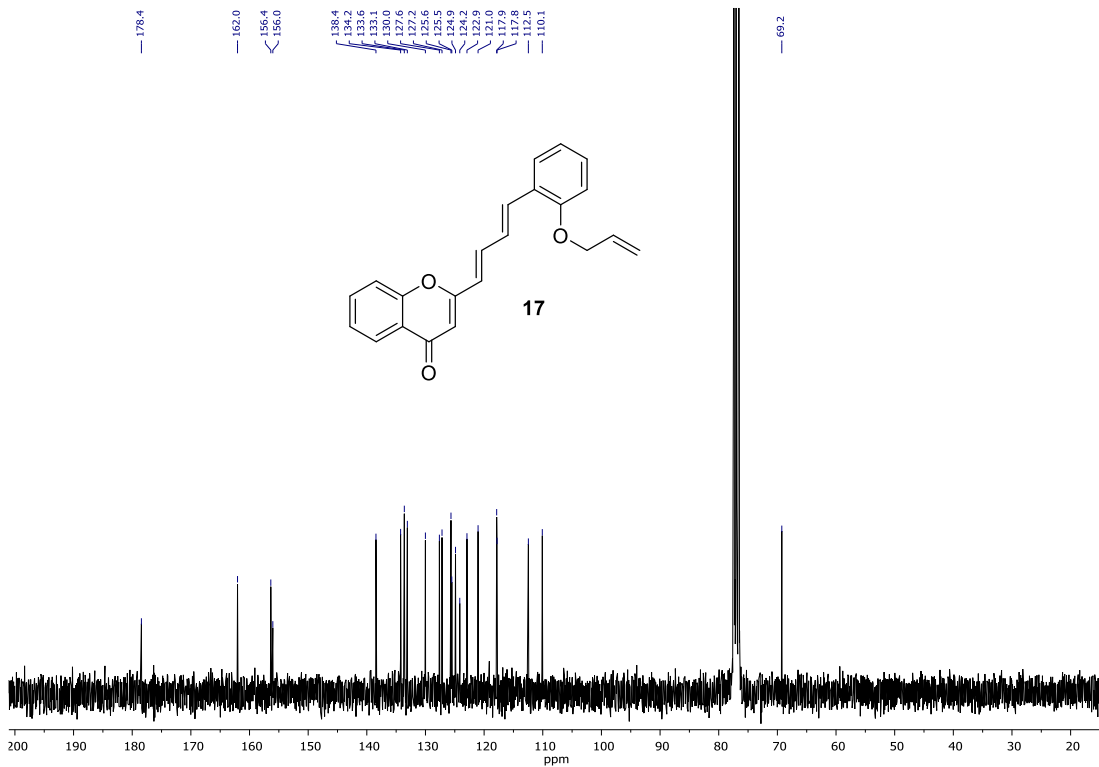

Figure S54: <sup>13</sup>C NMR of compound 17 (75 MHz, CDCl<sub>3</sub>).
